# Supplementary material for: Boron diamide derivatives containing N–N and N–P molecular fragments
Source: Royal Society of Chemistry journal article supplement (doi:10.1039/d3dt03665k), 2023-12-29
Supplement: d3dt03665k1.pdf [file d3dt03665k1.pdf]

## Supplementary Data for:

# Boron diamide derivatives containing N-N and N-P molecular fragments

Christopher Major, Shi-Ming Chen, and Douglas W. Stephan

### Contents

|                                                                                                             |    |
|-------------------------------------------------------------------------------------------------------------|----|
| General Considerations.....                                                                                 | 2  |
| Preparation of $\text{Br}_3\text{B}\cdot\text{PPh}_3$ .....                                                 | 2  |
| Synthesis of $(\text{HCN}(\text{Dipp}))_2\text{BBr}$ 1.....                                                 | 4  |
| Synthesis of $(\text{HCN}(\text{Dipp}))_2\text{BOSO}_2\text{CF}_3$ 3.....                                   | 4  |
| Synthesis of $(\text{H}_2\text{CN}(\text{Dipp}))_2\text{BOSO}_2\text{CF}_3$ 4.....                          | 8  |
| Synthesis of $(\text{H}_2\text{CN}(\text{Dipp}))_2\text{BNH}_2$ 6.....                                      | 10 |
| Synthesis of $[(\text{HCN}(\text{Dipp}))_2\text{B}(\text{NHNH}_3)][\text{O}_3\text{SCF}_3]$ 7.....          | 12 |
| Synthesis of $[(\text{H}_2\text{CN}(\text{Dipp}))_2\text{B}(\text{NHNH}_3)][\text{O}_3\text{SCF}_3]$ 8..... | 14 |
| Synthesis of $(\text{HCN}(\text{Dipp}))_2\text{B}(\text{NHNH}_2)$ 9.....                                    | 16 |
| Synthesis of $(\text{H}_2\text{CN}(\text{Dipp}))_2\text{B}(\text{NHNH}_2)$ 10:.....                         | 18 |
| Synthesis of $(\text{H}_2\text{CN}(\text{Dipp}))_2\text{B}(\text{N}_3)$ 11.....                             | 21 |
| Synthesis of $(\text{HCN}(\text{Dipp}))_2\text{B}(\text{NHPCl}_2)$ 12.....                                  | 22 |
| Synthesis of $(\text{HCN}(\text{Dipp}))_2\text{B}(\text{N}(\text{SiMe}_3)\text{PCl}_2)$ 15.....             | 25 |
| Synthesis of $[(\text{HCN}(\text{Dipp}))_2\text{BNPCL}]_2$ 17.....                                          | 32 |

## General Considerations

All reactions and work-up procedures were performed under an inert atmosphere of dry, oxygen-free N<sub>2</sub>, using standard Schlenk techniques or a glovebox (Innovative Technology, equipped with a -25 °C freezer) unless otherwise specified. CH<sub>2</sub>Cl<sub>2</sub>, *n*-pentane, *n*-hexane, Et<sub>2</sub>O, and toluene (Sigma-Aldrich) were dried using a Grubbs-type Innovative Technologies solvent purification system, degassed, and stored over activated 3 or 4 Å molecular sieves. Deuterated solvents (C<sub>6</sub>D<sub>6</sub>, CDCl<sub>3</sub>) were purchased from Cambridge Isotope Laboratories, Inc. or Sigma-Aldrich, and stored over activated 4Å molecular sieves prior to use, unless otherwise specified. All other reagents were purchased from Sigma-Aldrich. (HCN(Dipp))<sub>2</sub>BBr **1**,<sup>1</sup> (H<sub>2</sub>CN(Dipp))<sub>2</sub>BBr **2**,<sup>2</sup> (CN(Dipp))<sub>2</sub>BNH<sub>2</sub> **5**, (HCN(Dipp))<sub>2</sub>BNH(SiMe<sub>3</sub>) **13**, and (HCN(Dipp))<sub>2</sub>BNK(SiMe<sub>3</sub>) **14** were generated according to literature procedures.<sup>3</sup> Routine NMR spectra were obtained on a Varian MercuryPlus 300 MHz, Bruker Avance III 400 MHz, Agilent DD2 500 MHz, or Agilent DD2 600 MHz spectrometer and spectra were referenced to residual solvent of CDCl<sub>3</sub> (<sup>1</sup>H = 7.26; <sup>13</sup>C = 77.2), C<sub>6</sub>D<sub>6</sub> (<sup>1</sup>H = 7.16 ppm; <sup>13</sup>C = 128.06 ppm), C<sub>6</sub>D<sub>5</sub>Br (<sup>1</sup>H most downfield shift = 7.30 ppm) or externally (<sup>11</sup>B, BF<sub>3</sub>·OEt<sub>2</sub>; <sup>19</sup>F, CFCl<sub>3</sub>; <sup>31</sup>P, 85% H<sub>3</sub>PO<sub>4</sub>). <sup>13</sup>C spectra were primarily obtained on a 500 MHz Agilent DD2 NMR Spectrometer, equipped with a cryogenically cooled probe. Chemical shifts (δ) are reported in ppm and coupling constants are listed in Hz. High-resolution mass spectra (HRMS) were obtained on an Agilent 6538 Q-TOF (ESI), JEOL AccuTOF Plus 4G (DART) and Bruker Autoflex Speed (MALDI).

## Preparation of Br<sub>3</sub>B·PPh<sub>3</sub>

<sup>1</sup>H NMR (400 MHz, CDCl<sub>3</sub>) δ 7.89 – 7.79 (m, 6H), 7.69 – 7.62 (m, 3H), 7.57 – 7.47 (m, 6H). <sup>11</sup>B NMR (128 MHz, CDCl<sub>3</sub>) δ -14.7 (d, <sup>1</sup>J<sub>P-B</sub> = 146 Hz). <sup>31</sup>P NMR (162 MHz, CDCl<sub>3</sub>) δ -4.9 (q, <sup>1</sup>J<sub>P-B</sub> = 146 Hz).

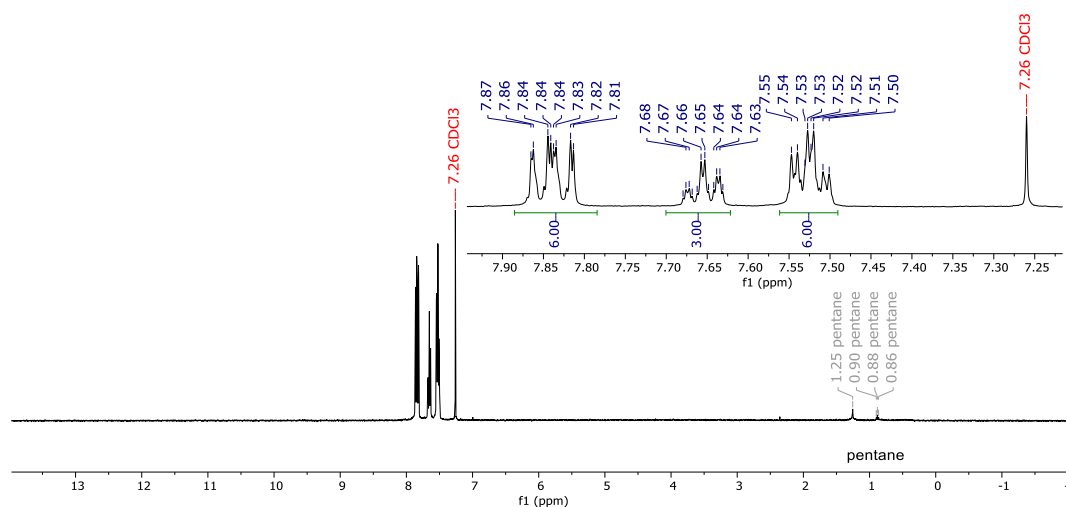

Figure S1.  $^1\text{H}$  NMR spectrum of  $\text{Br}_3\text{B}\cdot\text{PPh}_3$  in  $\text{CDCl}_3$  at 298 K.

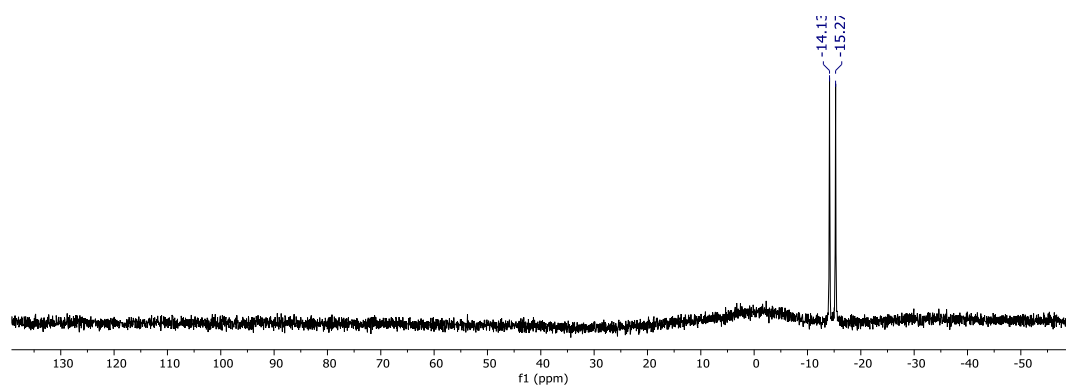

Figure S2.  $^{11}\text{B}$  NMR spectrum of  $\text{Br}_3\text{B}\cdot\text{PPh}_3$  in  $\text{CDCl}_3$  at 298 K.

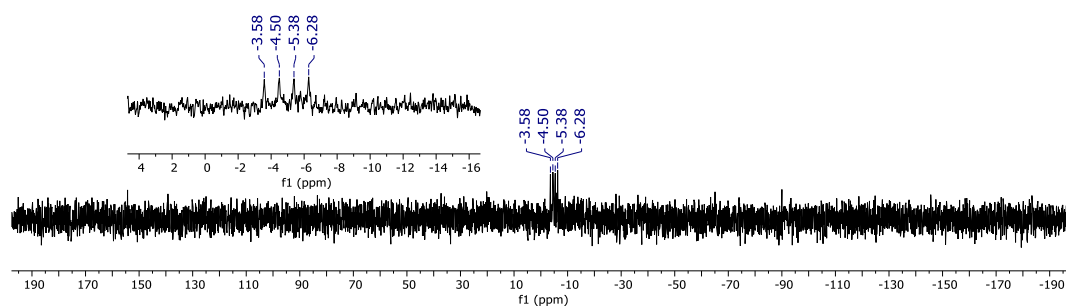

Figure 1.  $^{31}\text{P}$  NMR spectrum of  $\text{Br}_3\text{B}\cdot\text{PPh}_3$  in  $\text{CDCl}_3$  at 298 K.

### Synthesis of (HCN(Dipp))<sub>2</sub>BBr 1

<sup>1</sup>H NMR (400 MHz, CDCl<sub>3</sub>) δ 7.39 – 7.30 (m, 1H), 7.26 – 7.20 (m, 2H), 6.31 (s, 1H), 2.97 (hept, <sup>3</sup>J<sub>H-H</sub> = 7 Hz, 2H), 1.22 (d, <sup>3</sup>J<sub>H-H</sub> = 7 Hz, 24H). <sup>11</sup>B NMR (128 MHz, CDCl<sub>3</sub>) δ 20.3.

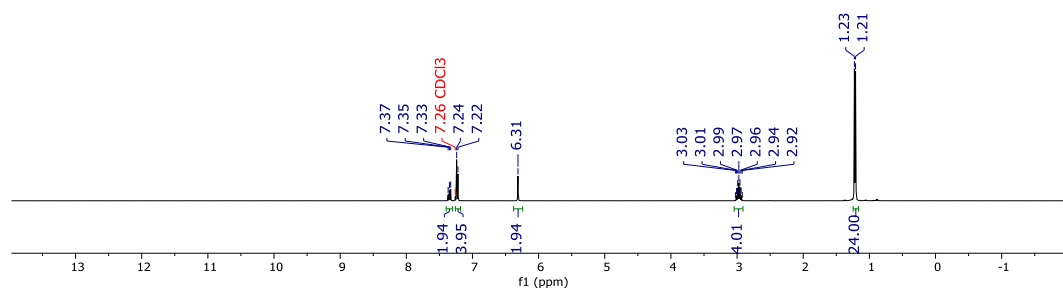

**Figure S4.** <sup>1</sup>H NMR spectrum of **1** in CDCl<sub>3</sub> at 298 K.

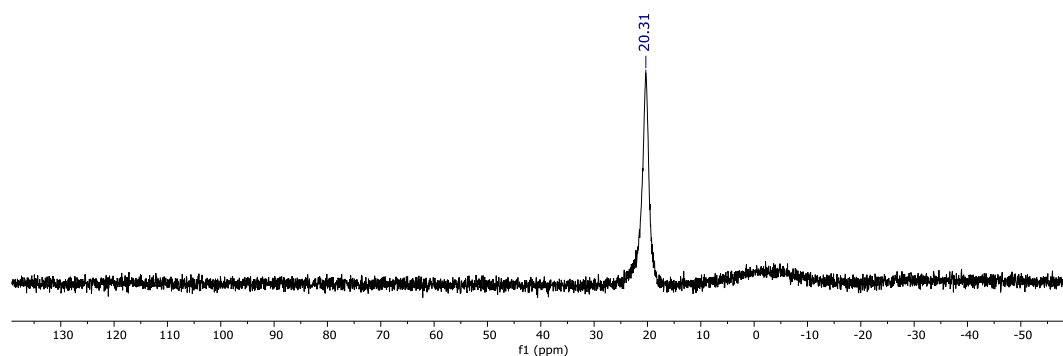

**Figure S5.** <sup>11</sup>B NMR spectrum of **1** in CDCl<sub>3</sub> at 298 K.

### Synthesis of (HCN(Dipp))<sub>2</sub>BOSO<sub>2</sub>CF<sub>3</sub> 3

<sup>1</sup>H NMR (400 MHz, C<sub>6</sub>D<sub>6</sub>) δ 7.24 – 7.17 (m, 2H), 7.13 – 7.08 (m, 4H), 6.01 (s, 2H), 3.16 (hept, <sup>3</sup>J<sub>H-H</sub> = 7 Hz, 4H), 1.33 (d, <sup>3</sup>J<sub>H-H</sub> = 7 Hz, 12H), 1.16 (d, <sup>3</sup>J<sub>H-H</sub> = 7 Hz, 12H). <sup>1</sup>H NMR (400 MHz, CDCl<sub>3</sub>) δ 7.40 – 7.32 (m, 2H), 7.26 – 7.20 (m, 4H), 6.20 (s, 2H), 2.98 (hept, <sup>3</sup>J<sub>H-H</sub> = 7 Hz, 4H), 1.25 (d, <sup>3</sup>J<sub>H-H</sub> = 7 Hz, 12H), 1.21 (d, <sup>3</sup>J<sub>H-H</sub> = 7 Hz, 12H). <sup>11</sup>B NMR (128 MHz, C<sub>6</sub>D<sub>6</sub>) δ 19.2. <sup>11</sup>B NMR (128 MHz, CDCl<sub>3</sub>) δ 18.9. <sup>13</sup>C{<sup>1</sup>H} NMR (126 MHz, CDCl<sub>3</sub>) δ 146.3, 134.8, 128.4, 123.7, 118.4, 28.7, 25.3, 23.3. <sup>19</sup>F NMR (376 MHz, C<sub>6</sub>D<sub>6</sub>) δ -76.7. <sup>19</sup>F NMR (377 MHz, CDCl<sub>3</sub>) δ -76.4. HRMS (TOF, DART+) m/z 537.25672 (high res., calc. for protonated molecular ion, [C<sub>27</sub>H<sub>37</sub>BN<sub>2</sub>O<sub>3</sub>F<sub>3</sub>S]<sup>+</sup>: 537.25646).

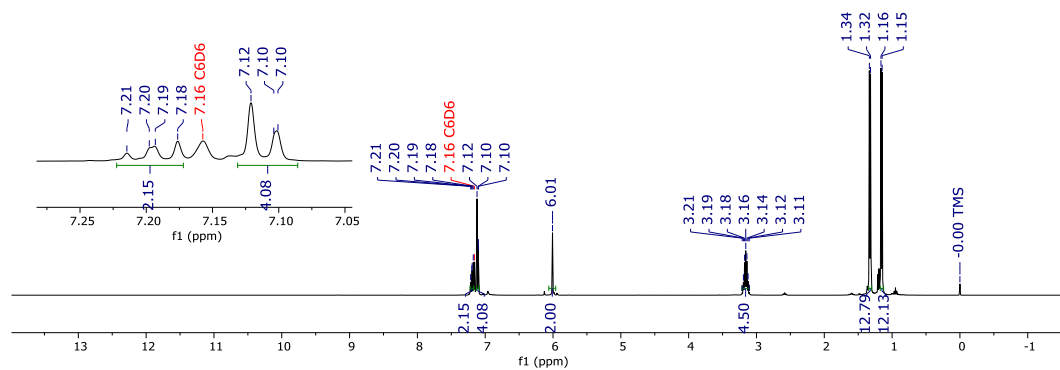

Figure S5.  $^1\text{H}$  NMR spectrum of **3** in  $\text{C}_6\text{D}_6$  at 298 K.

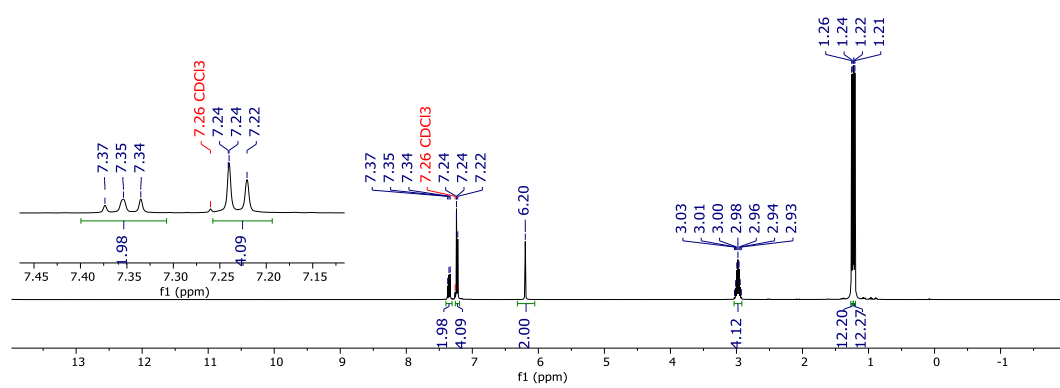

Figure S6.  $^1\text{H}$  NMR spectrum of **3** in  $\text{CDCl}_3$  at 298 K.

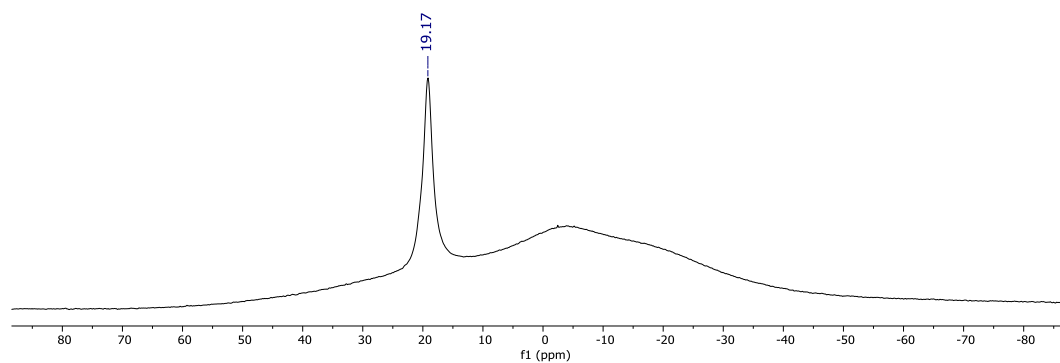

Figure S7.  $^{11}\text{B}$  NMR spectrum of **3** in  $\text{C}_6\text{D}_6$  at 298 K.

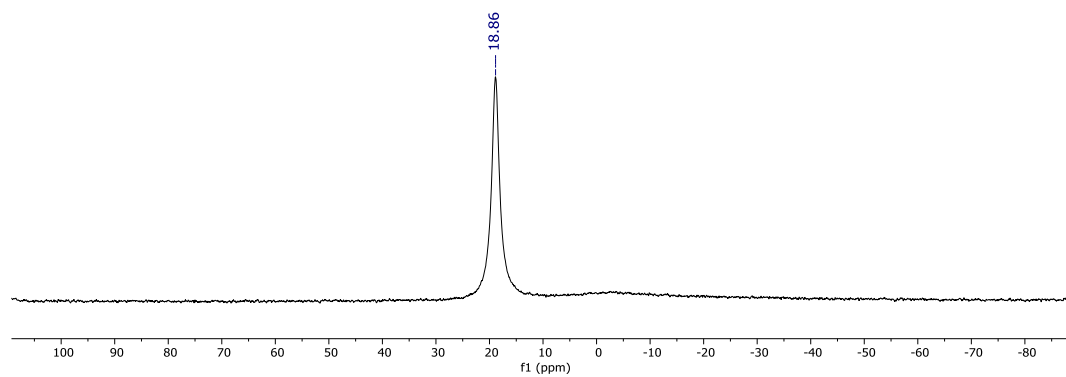

Figure S8. <sup>11</sup>B NMR spectrum of **3** in CDCl<sub>3</sub> at 298 K.

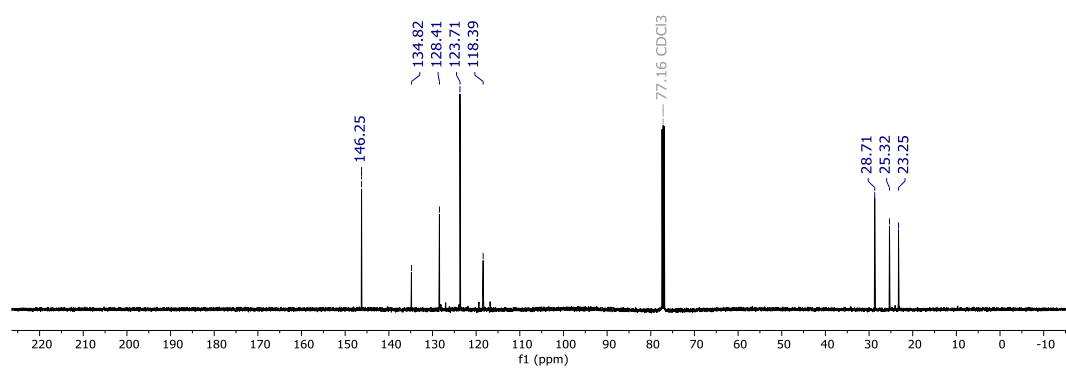

Figure S9. <sup>13</sup>C{<sup>1</sup>H} NMR spectrum of **3** in CDCl<sub>3</sub> at 298 K.

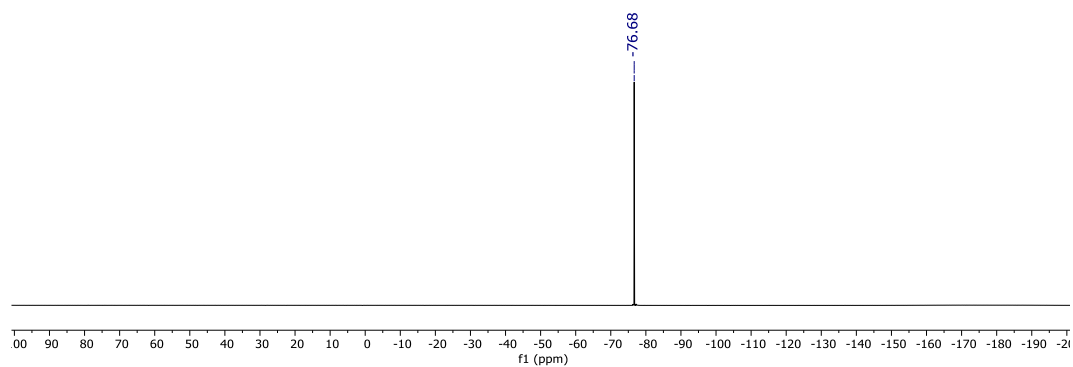

Figure S10. <sup>19</sup>F NMR spectrum of **3** in C<sub>6</sub>D<sub>6</sub> at 298 K.

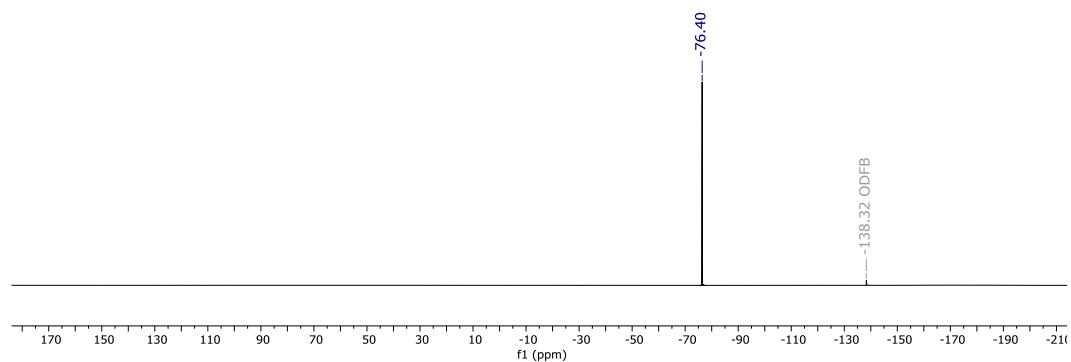

Figure S11.  $^{19}\text{F}$  NMR spectrum of **3** in  $\text{CDCl}_3$  at 298 K.

DART IONIZATION

AccuTOF 4G

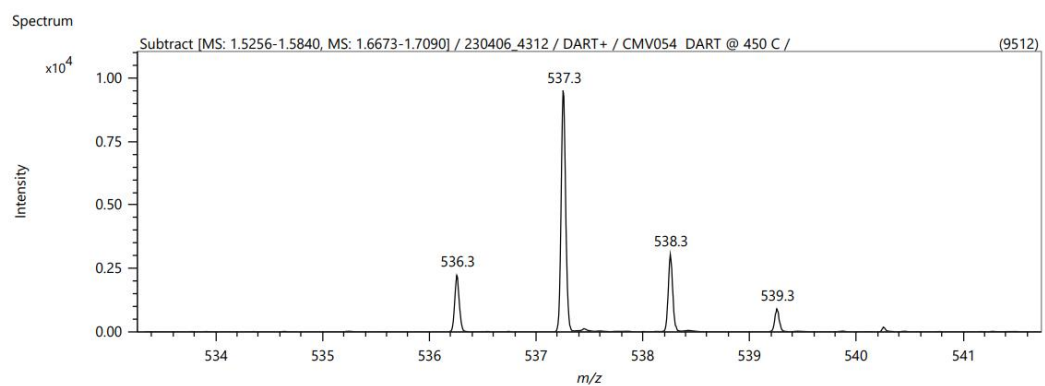

Elemental Composition

| Parameters |                 | Elements Set 1: |     |     |    |    |   |   |   |
|------------|-----------------|-----------------|-----|-----|----|----|---|---|---|
| Tolerance: | $\pm 10.00$ mDa | Symbol          | C   | H   | O  | N  | B | S | F |
| Electron:  | Odd/Even        | Min             | 0   | 0   | 0  | 0  | 1 | 1 | 3 |
| Charge:    | +1              | Max             | 100 | 200 | 20 | 10 | 1 | 1 | 3 |
| DBE:       | -1.5 - 100.0    |                 |     |     |    |    |   |   |   |

Results

| Mass      | Intensity | Formula              | Calculated Mass | Mass Difference [mDa] | Mass Difference [ppm] | DBE  |
|-----------|-----------|----------------------|-----------------|-----------------------|-----------------------|------|
| 537.25672 | 9512.00   | C27 H37 B N2 O3 F3 S | 537.25646       | 0.27                  | 0.50                  | 9.5  |
|           |           | C25 H35 B N5 O2 F3 S | 537.25511       | 1.61                  | 3.00                  | 10.0 |
|           |           | C30 H35 B N3 F3 S    | 537.25914       | -2.41                 | -4.49                 | 14.0 |
|           |           | C16 H37 B N8 O6 F3 S | 537.25964       | -2.92                 | -5.43                 | 1.5  |
|           |           | C24 H39 B N O6 F3 S  | 537.25378       | 2.95                  | 5.49                  | 5.0  |
|           |           | C23 H33 B N8 O F3 S  | 537.25377       | 2.95                  | 5.50                  | 10.5 |

1 / 2

AIMS Mass Spectrometry Laboratory, University of Toronto

2023-04-06

Figure S12. HR-MS (TOF DART+) data for **3**.

## Synthesis of $(\text{H}_2\text{CN}(\text{Dipp}))_2\text{BOSO}_2\text{CF}_3$ **4**

$^1\text{H}$  NMR (500 MHz,  $\text{CDCl}_3$ )  $\delta$  7.31 – 7.25 (m, 2H), 7.21 – 7.16 (m, 4H), 3.73 (s, 4H), 3.37 (hept,  $^3J_{\text{H-H}} = 7$  Hz, 4H), 1.31 (d,  $^3J_{\text{H-H}} = 7$  Hz, 12H), 1.28 (d,  $^3J_{\text{H-H}} = 7$  Hz, 12H).  $^{11}\text{B}$  NMR (128 MHz,  $\text{CDCl}_3$ )  $\delta$  22.8.  $^{13}\text{C}\{^1\text{H}\}$  NMR (126 MHz,  $\text{CDCl}_3$ )  $\delta$  147.4, 135.7, 127.7, 124.0, 117.7 (q,  $^1J_{\text{C-F}} = 318$  Hz, 1C), 77.4, 76.9, 51.2, 28.7, 25.7, 23.9.  $^{19}\text{F}$  NMR (377 MHz,  $\text{CDCl}_3$ )  $\delta$  -76.7. HRMS (TOF, DART+)  $m/z$  539.27243 (high res., calc. for protonated molecular ion,  $[\text{C}_{27}\text{H}_{39}\text{BN}_2\text{O}_3\text{F}_3\text{S}]^+$ : 539.27211)

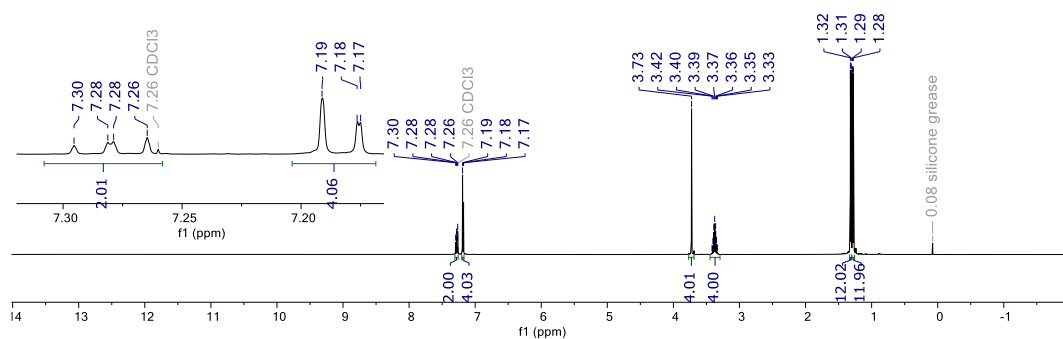

**Figure S13.**  $^1\text{H}$  NMR spectrum of **4** in  $\text{CDCl}_3$  at 298 K.

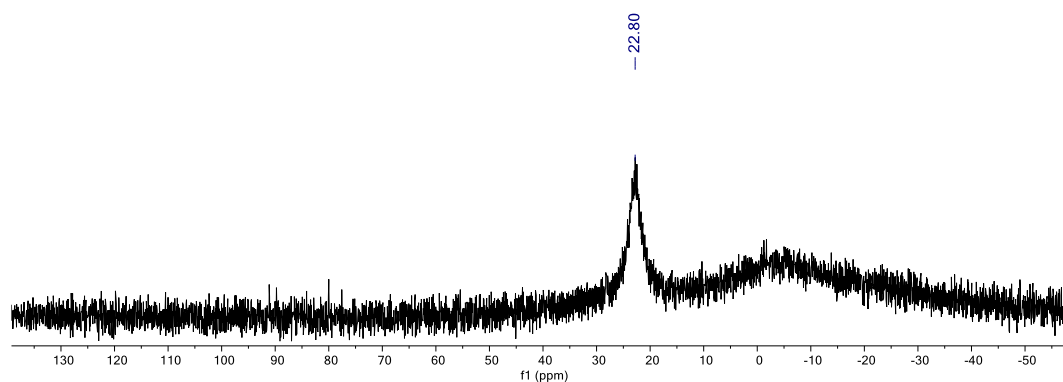

**Figure S14.**  $^{11}\text{B}$  NMR spectrum of **4** in  $\text{CDCl}_3$  at 298 K.



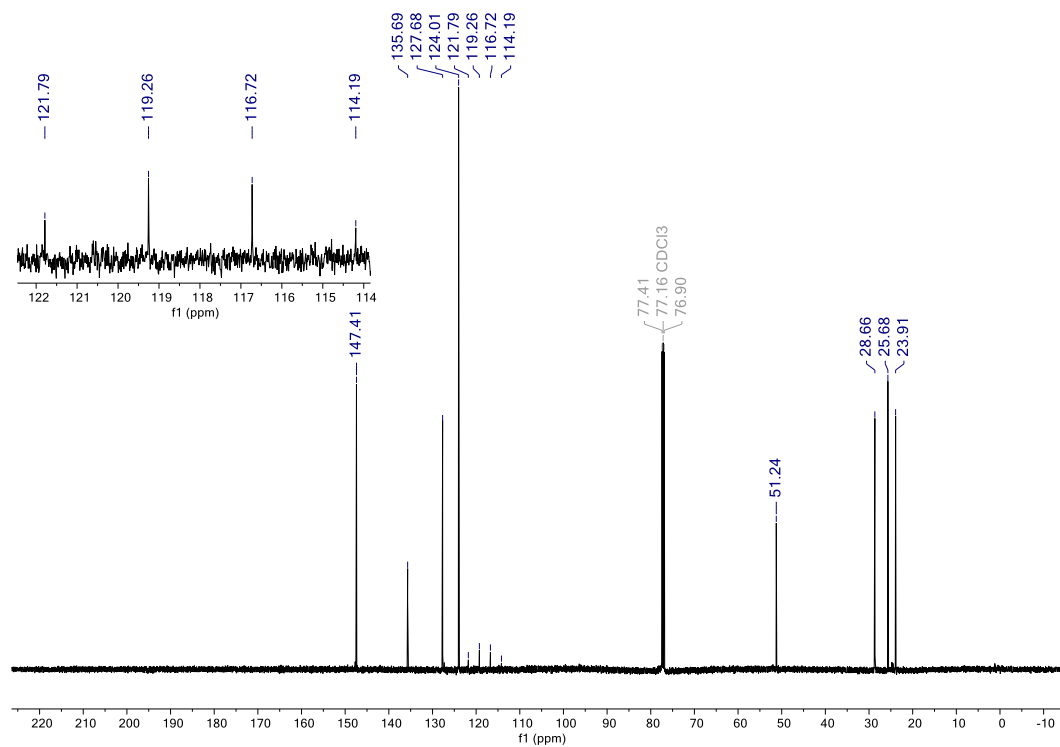

Figure S15.  $^{13}\text{C}\{^1\text{H}\}$  NMR spectrum of **4** in  $\text{CDCl}_3$  at 298 K.

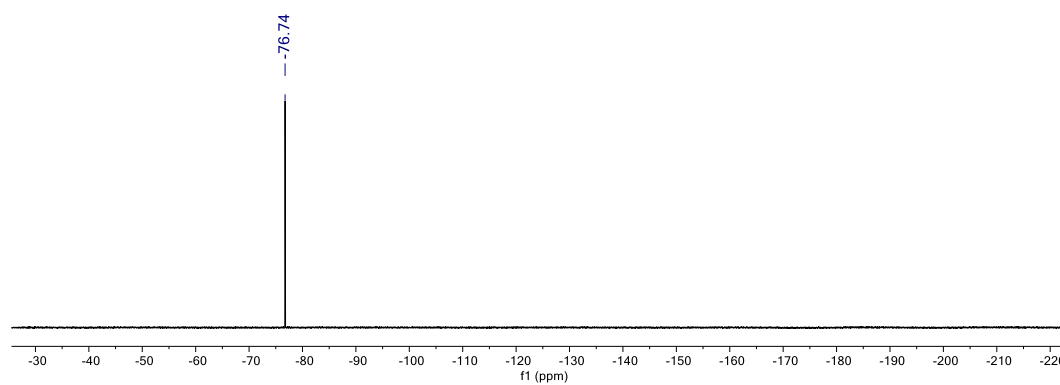

Figure S16.  $^{19}\text{F}$  NMR spectrum of **4** in  $\text{CDCl}_3$  at 298 K.

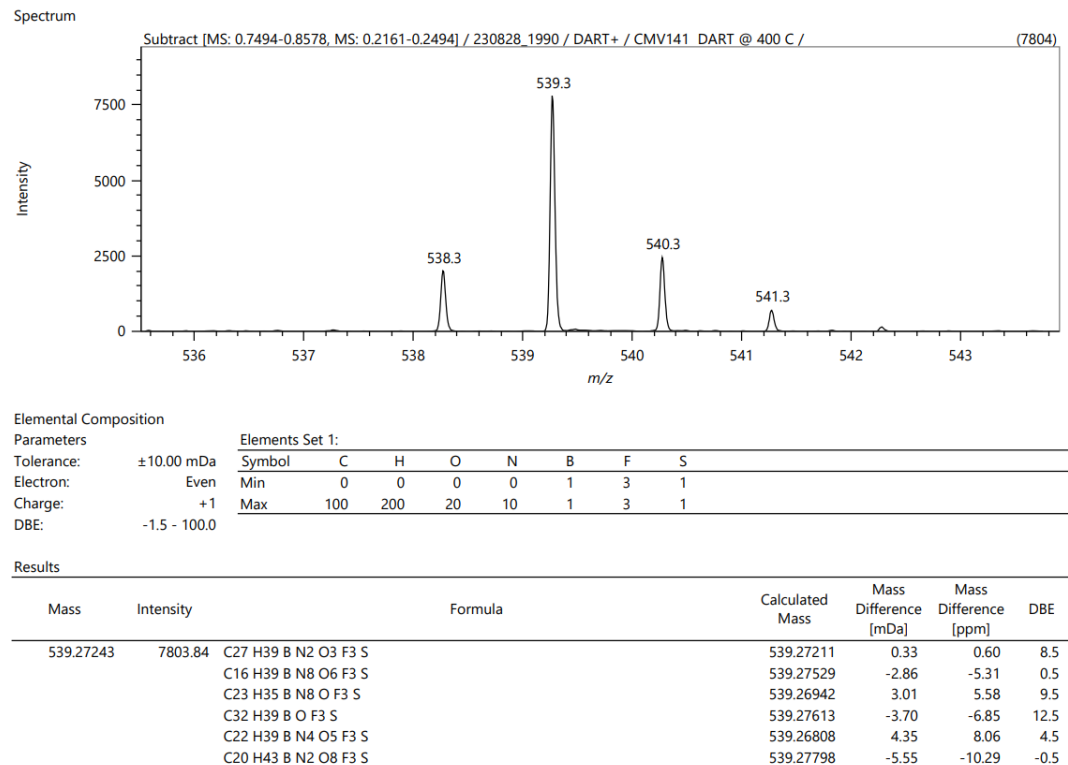

Figure S17. HR-MS (TOF, DART+) for **4**.

### Synthesis of $(\text{H}_2\text{CN}(\text{Dipp}))_2\text{BNH}_2$ **6**

$^1\text{H}$  NMR (400 MHz,  $\text{C}_6\text{D}_6$ )  $\delta$  7.27 – 7.18 (m, 2H), 7.20 – 7.13 (m, 4H), 3.56 (hept,  $^3J_{\text{H-H}} = 7$  Hz, 4H), 3.44 (s, 4H), 1.31 (d,  $J = 7$  Hz, 12H), 1.31 (d,  $^3J_{\text{H-H}} = 7$  Hz, 12H), 1.05 (s, 2H).  $^{11}\text{B}$  NMR (128 MHz,  $\text{C}_6\text{D}_6$ )  $\delta$  25.4.  $^{13}\text{C}\{^1\text{H}\}$  NMR (126 MHz,  $\text{C}_6\text{D}_6$ )  $\delta$  148.8, 143.8, 140.0, 127.0, 52.0, 28.6, 25.1, 24.7. HRMS (TOF, DART+)  $m/z$  406.33901 (high res., calc. for protonated molecular ion,  $[\text{C}_{26}\text{H}_{41}\text{BN}_3]^+$ : 406.33881)

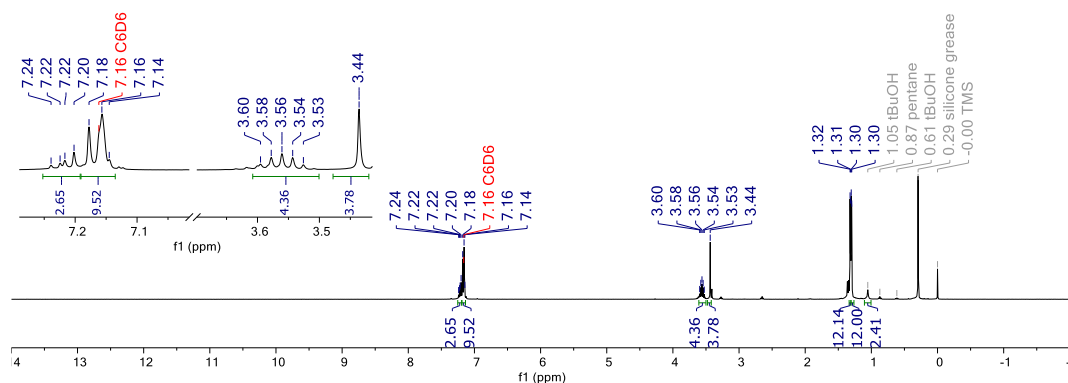

Figure S18.  $^1\text{H}$  NMR spectrum of **6** in  $\text{C}_6\text{D}_6$  at 298 K.

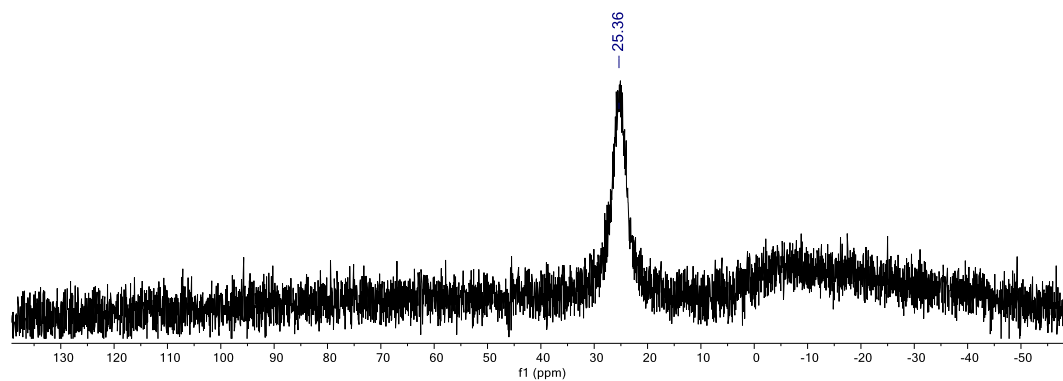

Figure S19.  $^{11}\text{B}$  NMR spectrum of **6** in  $\text{C}_6\text{D}_6$  at 298 K.

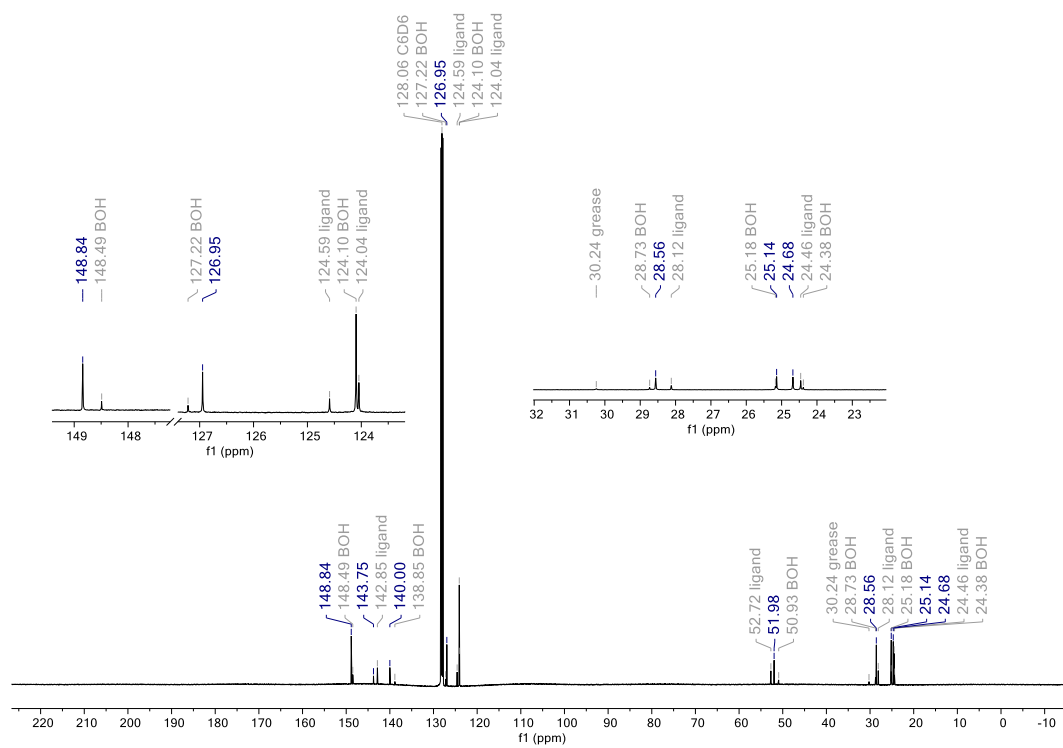

Figure S20.  $^{13}\text{C}\{^1\text{H}\}$  NMR spectrum of **6** in  $\text{C}_6\text{D}_6$  at 298 K.

DART IONIZATION

AccuTOF 4G

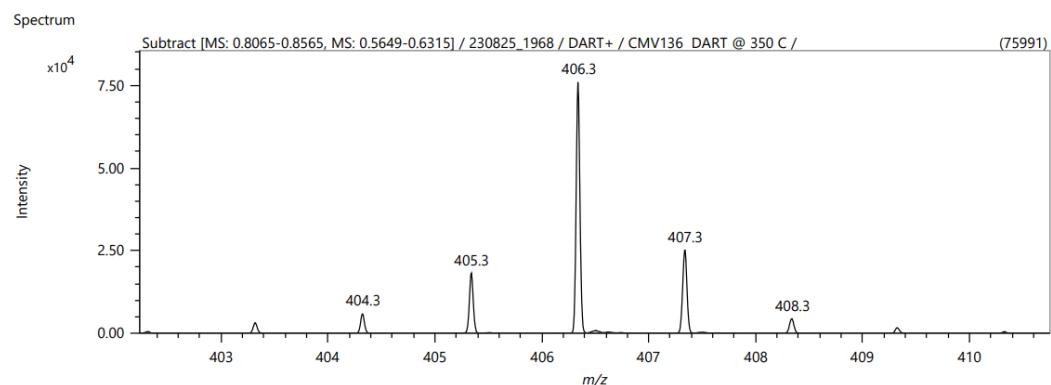

Elemental Composition

Parameters

Tolerance:  $\pm 10.00$  mDa  
 Electron: Even  
 Charge: +1  
 DBE: -1.5 - 100.0

Elements Set 1:

| Symbol | C   | H   | O  | N  | S | B |
|--------|-----|-----|----|----|---|---|
| Min    | 0   | 0   | 0  | 0  | 0 | 0 |
| Max    | 100 | 200 | 10 | 10 | 0 | 1 |

Results

| Mass      | Intensity | Formula         | Calculated Mass | Mass Difference [mDa] | Mass Difference [ppm] | DBE |
|-----------|-----------|-----------------|-----------------|-----------------------|-----------------------|-----|
| 406.33901 | 75990.64  | C26 H41 B N3    | 406.33881       | 0.20                  | 0.50                  | 8.5 |
|           |           | C19 H44 N5 O4   | 406.33878       | 0.23                  | 0.55                  | 0.5 |
|           |           | C20 H40 N9      | 406.34012       | -1.11                 | -2.74                 | 5.5 |
|           |           | C15 H41 B N9 O3 | 406.34199       | -2.99                 | -7.35                 | 0.5 |
|           |           | C24 H44 N3 O2   | 406.34280       | -3.80                 | -9.35                 | 4.5 |
|           |           | C21 H41 B N5 O2 | 406.33478       | 4.22                  | 10.40                 | 4.5 |

1 / 2

AIMS Mass Spectrometry Laboratory, University of Toronto

2023-08-25

Figure S21. HR-MS data (TOF, DART+) for **6**.

### Synthesis of [(HCN(Dipp))<sub>2</sub>B(NHNH<sub>3</sub>)] [O<sub>3</sub>SCF<sub>3</sub>] **7**

<sup>1</sup>H NMR (400 MHz, CDCl<sub>3</sub>)  $\delta$  7.60 (s, 3H), 7.34 – 7.27 (m, 3H), 7.23 – 7.12 (m, 4H), 5.99 (s, 2H), 4.47 (s, 1H), 3.00 (hept, <sup>3</sup>J<sub>H-H</sub> = 7 Hz, 4H), 1.18 (d, <sup>3</sup>J<sub>H-H</sub> = 7 Hz, 12H), 1.13 (d, <sup>3</sup>J<sub>H-H</sub> = 7 Hz, 12H). <sup>11</sup>B NMR (128 MHz, CDCl<sub>3</sub>)  $\delta$  20.7. <sup>13</sup>C{<sup>1</sup>H} NMR (126 MHz, CDCl<sub>3</sub>)  $\delta$  147.0, 135.4, 128.8, 124.4, 118.1, 28.5, 24.6, 23.4. <sup>19</sup>F NMR (376 MHz, CDCl<sub>3</sub>)  $\delta$  -78.4.

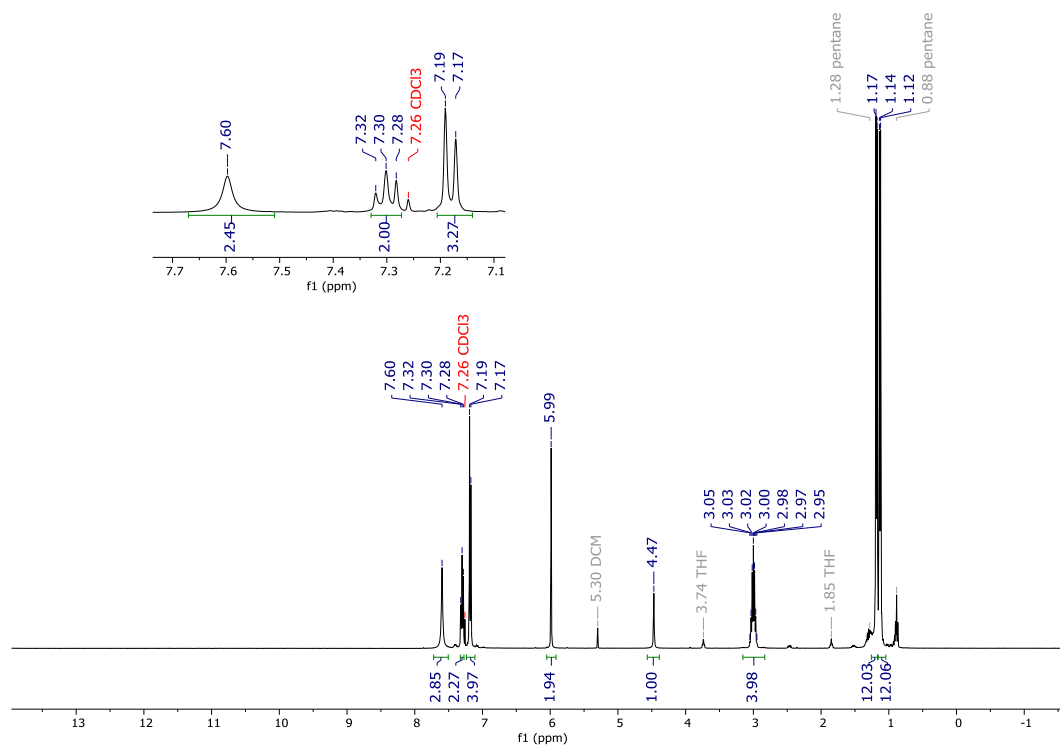

Figure S22. <sup>1</sup>H NMR spectrum of **7** in CDCl<sub>3</sub> at 298 K.

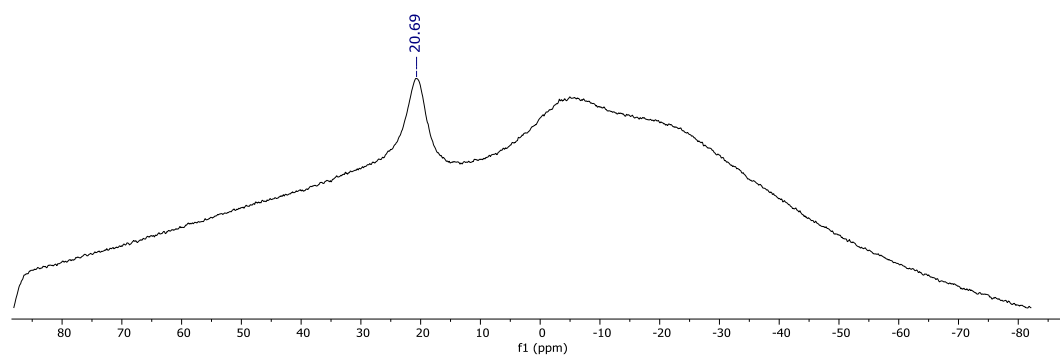

Figure S23. <sup>11</sup>B NMR spectrum of **7** in CDCl<sub>3</sub> at 298 K.

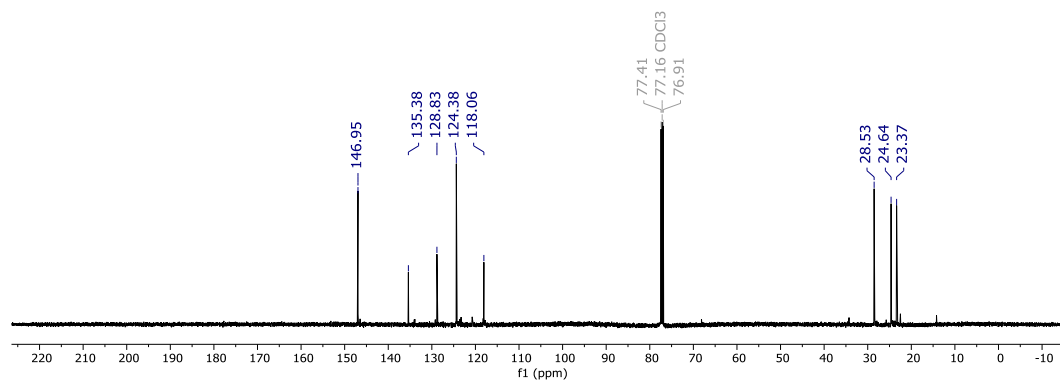

**Figure S24.**  $^{13}\text{C}\{^1\text{H}\}$  NMR spectrum of **7** in  $\text{CDCl}_3$  at 298 K.

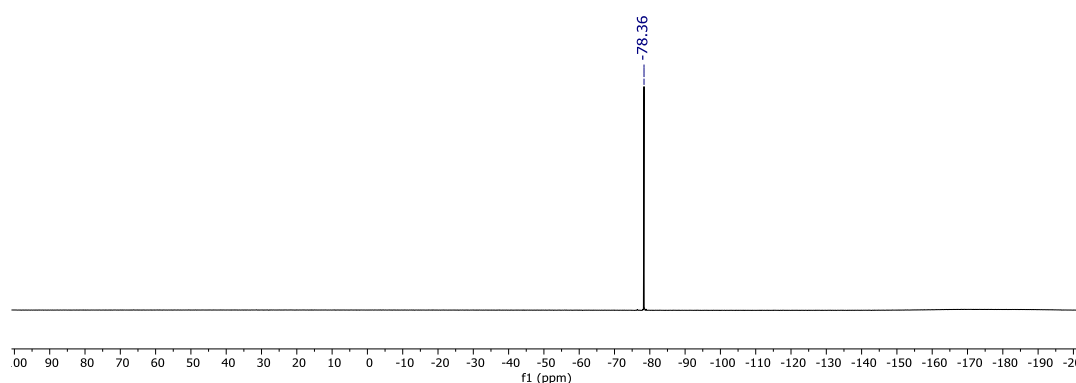

**Figure S25.**  $^{19}\text{F}$  NMR spectrum of **7** in  $\text{CDCl}_3$  at 298 K.

### Synthesis of $[(\text{H}_2\text{CN}(\text{Dipp}))_2\text{B}(\text{NHNH}_3)][\text{O}_3\text{SCF}_3]$ **8**

$^1\text{H}$  NMR (400 MHz,  $\text{CDCl}_3$ )  $\delta$  7.58 (s, 3H), 7.29 – 7.22 (m, 3H), 7.20 – 7.13 (m, 4H), 4.22 (s, 1H), 3.60 (s, 4H), 3.33 (hept,  $^3J_{\text{H-H}} = 7$  Hz, 4H), 1.27 (d,  $^3J_{\text{H-H}} = 7$  Hz, 12H), 1.17 (d,  $^3J_{\text{H-H}} = 7$  Hz, 12H).  $^{11}\text{B}$  NMR (128 MHz,  $\text{CDCl}_3$ )  $\delta$  23.3.  $^{13}\text{C}\{^1\text{H}\}$  NMR (126 MHz,  $\text{CDCl}_3$ )  $\delta$  148.3, 136.5, 128.2, 124.7, 52.3, 28.4, 25.0, 24.2.  $^{19}\text{F}$  NMR (376 MHz,  $\text{CDCl}_3$ )  $\delta$  -78.4.

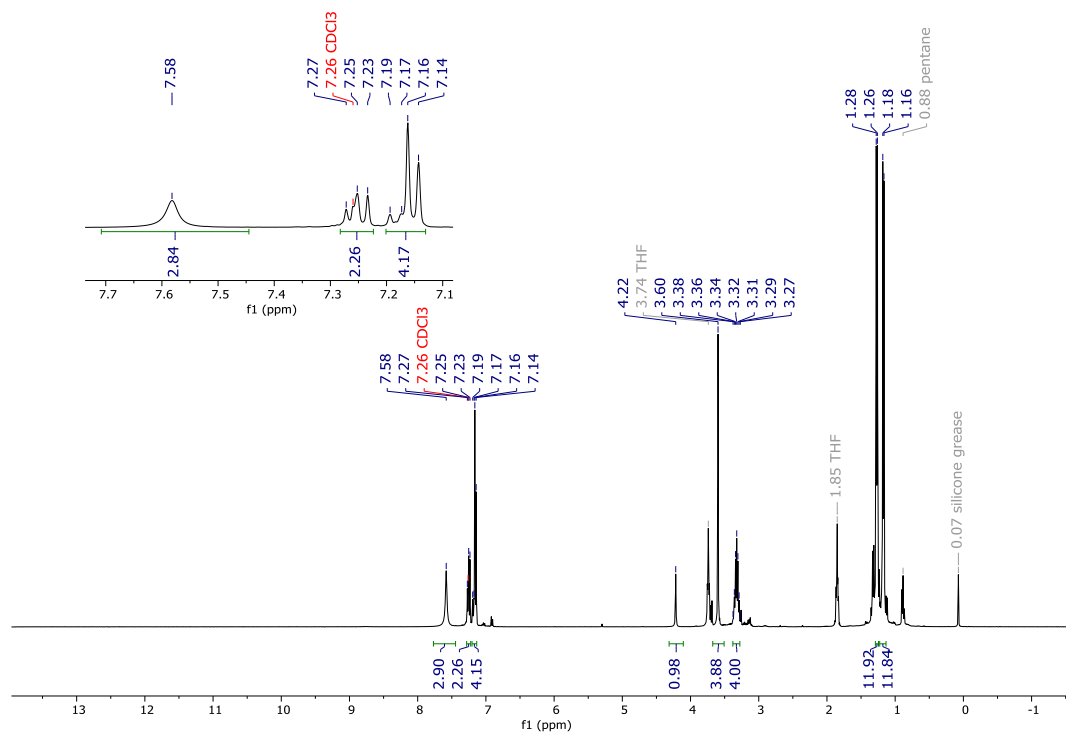

Figure S25.  $^1\text{H}$  NMR spectrum of **8** in  $\text{CDCl}_3$  at 298 K.

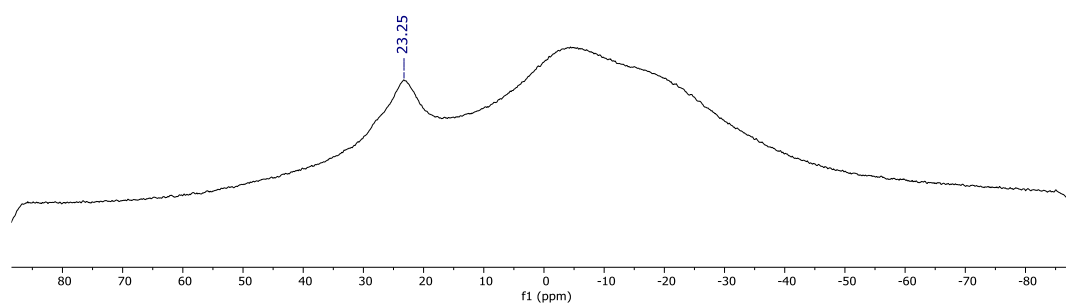

Figure S26.  $^{11}\text{B}$  NMR spectrum of **8** in  $\text{CDCl}_3$  at 298 K.

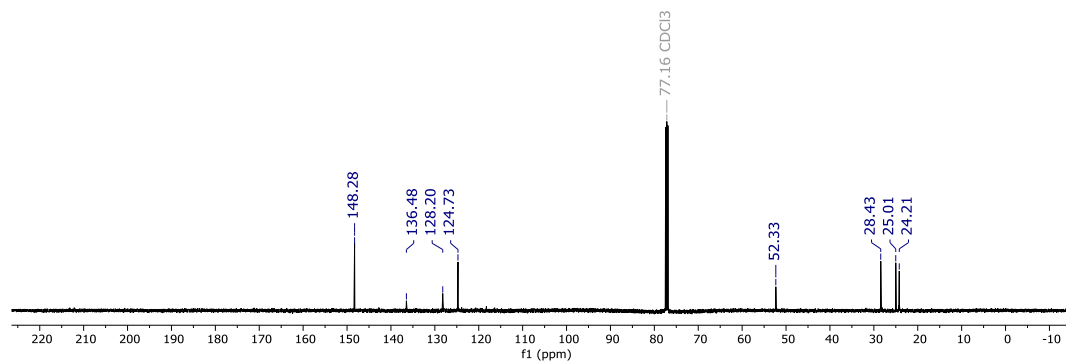

Figure S27.  $^{13}\text{C}\{^1\text{H}\}$  NMR spectrum of **8** in  $\text{CDCl}_3$  at 298 K.

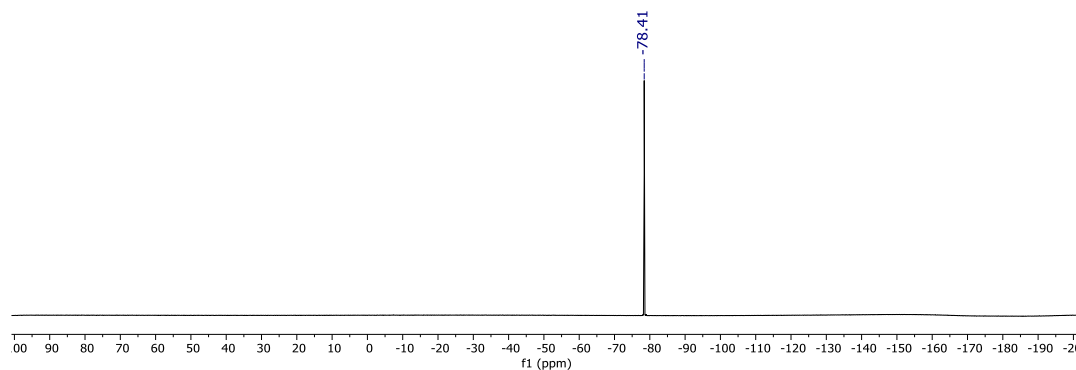

**Figure S28.**  $^{19}\text{F}$  NMR spectrum of **8** in  $\text{CDCl}_3$  at 298 K.

### Synthesis of $(\text{HCN}(\text{Dipp}))_2\text{B}(\text{NHNH}_2)$ **9**

$^1\text{H}$  NMR (500 MHz,  $\text{CDCl}_3$ )  $\delta$  7.28 – 7.24 (m, 2H), 7.20 – 7.16 (m, 4H), 5.93 (s, 2H), 3.39 (s, 1H), 3.22 (hept,  $^3J_{\text{H-H}} = 7$  Hz, 4H), 2.56 (s, 2H), 1.23 (d,  $^3J_{\text{H-H}} = 7$  Hz, 24H).  $^{11}\text{B}$  NMR (128 MHz,  $\text{CDCl}_3$ )  $\delta$  22.0.  $^{13}\text{C}\{^1\text{H}\}$  NMR (126 MHz,  $\text{CDCl}_3$ )  $\delta$  147.0, 138.5, 127.2, 123.4, 117.3, 28.4, 24.4, 23.9. HRMS (TOF, DART+)  $m/z$  419.33430 (high res., calc. for protonated molecular ion,  $[\text{C}_{26}\text{H}_{40}\text{BN}_4]^+$ : 419.33405)

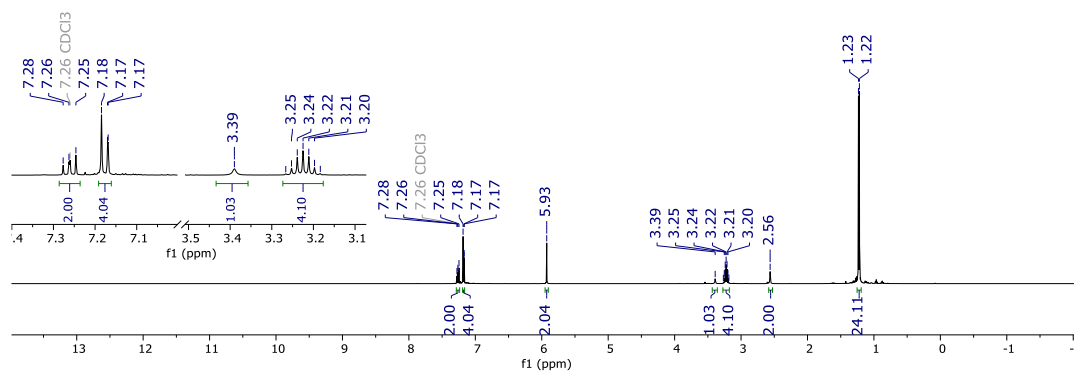

**Figure S29.**  $^1\text{H}$  NMR spectrum of **9** in  $\text{CDCl}_3$  at 298 K.



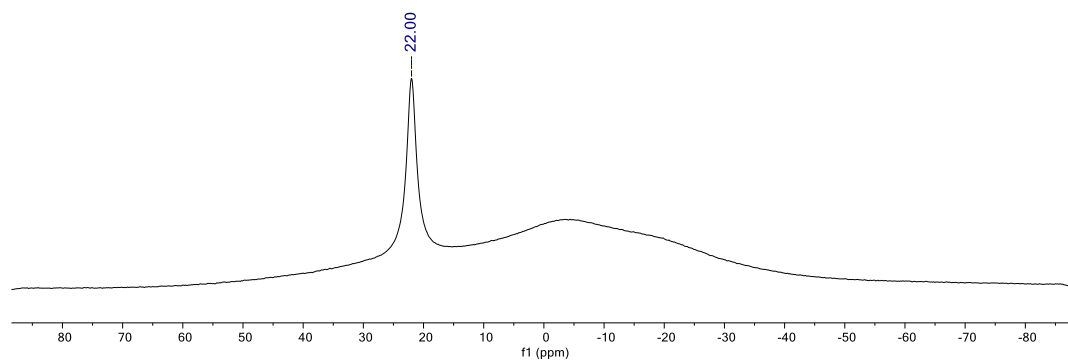

Figure S30.  $^{11}\text{B}$  NMR spectrum of **9** in  $\text{CDCl}_3$  at 298 K.

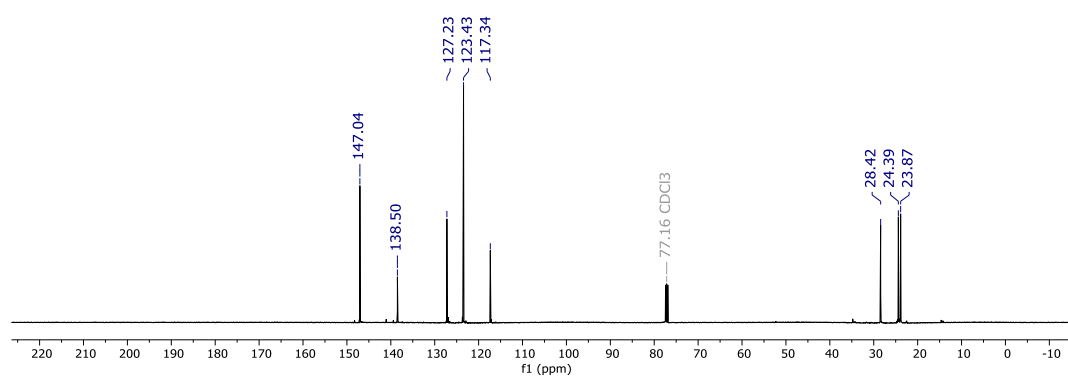

Figure S31.  $^{13}\text{C}\{^1\text{H}\}$  NMR spectrum of **9** in  $\text{CDCl}_3$  at 298 K.

DART IONIZATION

AccuTOF 4G

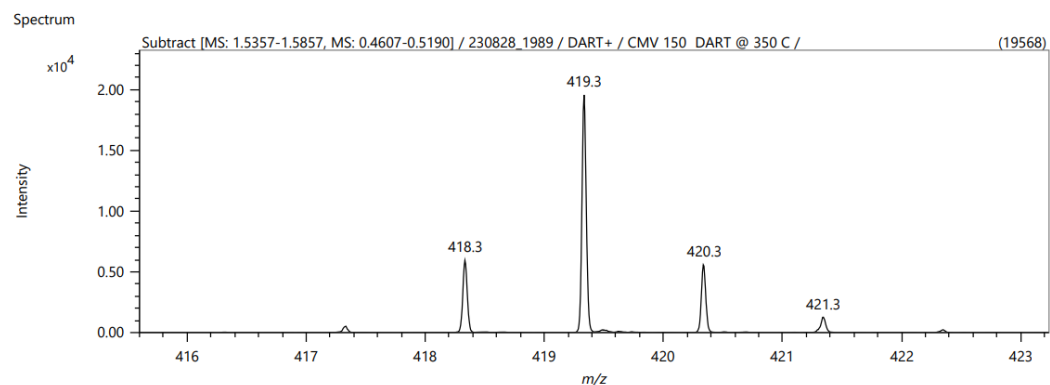

## Elemental Composition

## Parameters

Tolerance:  $\pm 10.00$  mDa  
 Electron: Even  
 Charge: +1  
 DBE: -1.5 - 100.0

## Elements Set 1:

| Symbol | C   | H   | O  | N  | B |
|--------|-----|-----|----|----|---|
| Min    | 0   | 0   | 0  | 0  | 1 |
| Max    | 100 | 200 | 20 | 10 | 1 |

## Results

| Mass      | Intensity | Formula                                                          | Calculated Mass | Mass Difference [mDa] | Mass Difference [ppm] | DBE |
|-----------|-----------|------------------------------------------------------------------|-----------------|-----------------------|-----------------------|-----|
| 419.33430 | 19567.92  | C <sub>26</sub> H <sub>40</sub> B N <sub>4</sub>                 | 419.33405       | 0.25                  | 0.59                  | 9.5 |
|           |           | C <sub>25</sub> H <sub>44</sub> B O <sub>4</sub>                 | 419.33272       | 1.59                  | 3.78                  | 4.5 |
|           |           | C <sub>15</sub> H <sub>40</sub> B N <sub>10</sub> O <sub>3</sub> | 419.33724       | -2.94                 | -7.01                 | 1.5 |
|           |           | C <sub>21</sub> H <sub>40</sub> B N <sub>6</sub> O <sub>2</sub>  | 419.33003       | 4.27                  | 10.19                 | 5.5 |
|           |           | C <sub>20</sub> H <sub>44</sub> B N <sub>2</sub> O <sub>6</sub>  | 419.32869       | 5.61                  | 13.38                 | 0.5 |
|           |           | C <sub>19</sub> H <sub>44</sub> B N <sub>4</sub> O <sub>5</sub>  | 419.33993       | -5.62                 | -13.41                | 0.5 |

1 / 2

AIMS Mass Spectrometry Laboratory, University of Toronto

2023-08-28

Figure S32. HR-MS (TOF DART+) data for **10**.Synthesis of (H<sub>2</sub>CN(Dipp))<sub>2</sub>B(NHNH<sub>2</sub>) **10**:

<sup>1</sup>H NMR (500 MHz, CDCl<sub>3</sub>)  $\delta$  7.26 – 7.17 (m, 2H), 7.17 – 7.12 (m, 4H), 3.54 (s, 4H), 3.50 (hept, <sup>3</sup>J<sub>H-H</sub> = 7 Hz, 4H), 3.17 (s, 1H), 2.46 (s, 2H), 1.31 (d, <sup>3</sup>J<sub>H-H</sub> = 7 Hz, 12H), 1.26 (d, <sup>3</sup>J<sub>H-H</sub> = 7 Hz, 12H). <sup>11</sup>B NMR (128 MHz, CDCl<sub>3</sub>)  $\delta$  24.6. <sup>13</sup>C{<sup>1</sup>H} NMR (126 MHz, CDCl<sub>3</sub>)  $\delta$  148.3, 139.9, 126.6, 123.8, 52.3, 28.3, 24.8, 24.6. HRMS (TOF, DART+)  $m/z$  421.34915 (high res., calc. for protonated molecular ion, [C<sub>26</sub>H<sub>42</sub>BN<sub>4</sub>]<sup>+</sup>: 421.34970).

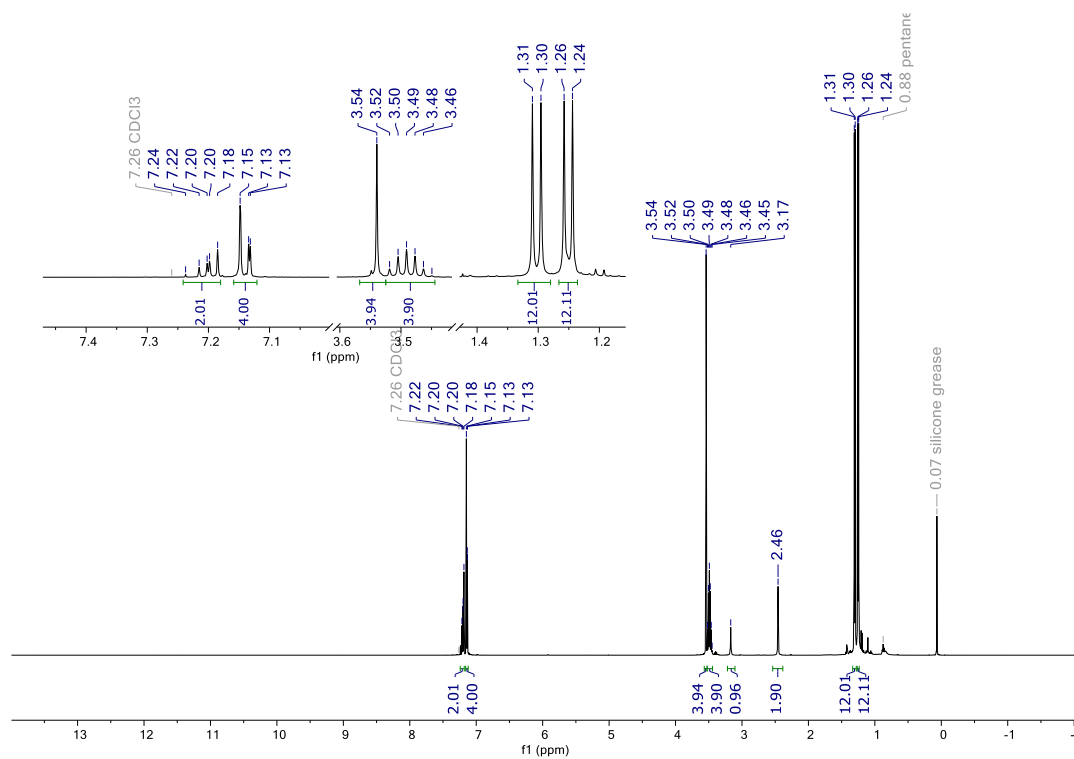

Figure S33. <sup>1</sup>H NMR spectrum of **10** in CDCl<sub>3</sub> at 298 K.

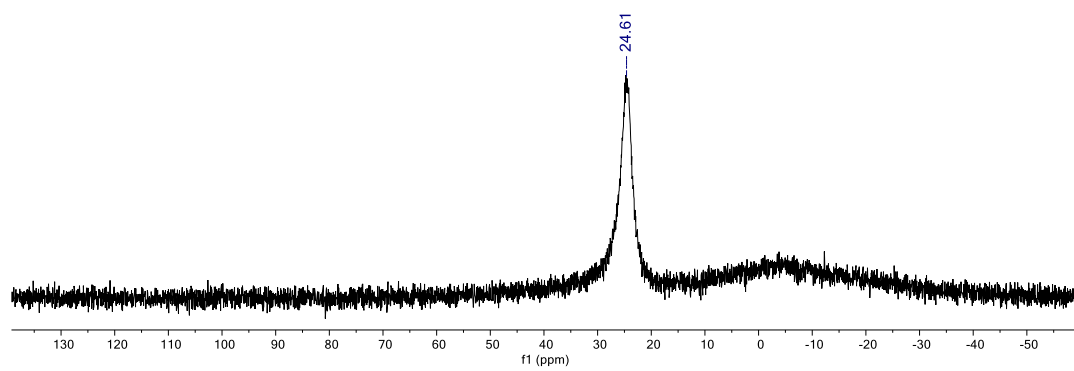

Figure S34. <sup>11</sup>B NMR spectrum of **10** in CDCl<sub>3</sub> at 298 K.

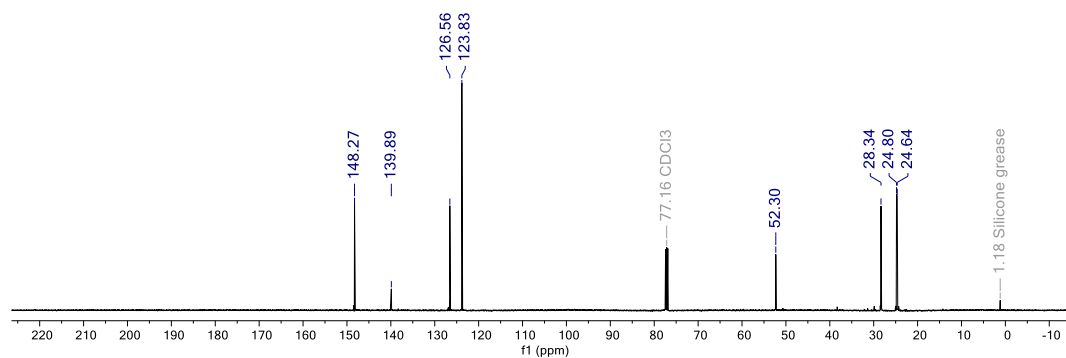

Figure S35.  $^{13}\text{C}\{^1\text{H}\}$  NMR spectrum of **10** in  $\text{CDCl}_3$  at 298 K.

DART IONIZATION

AccuTOF 4G

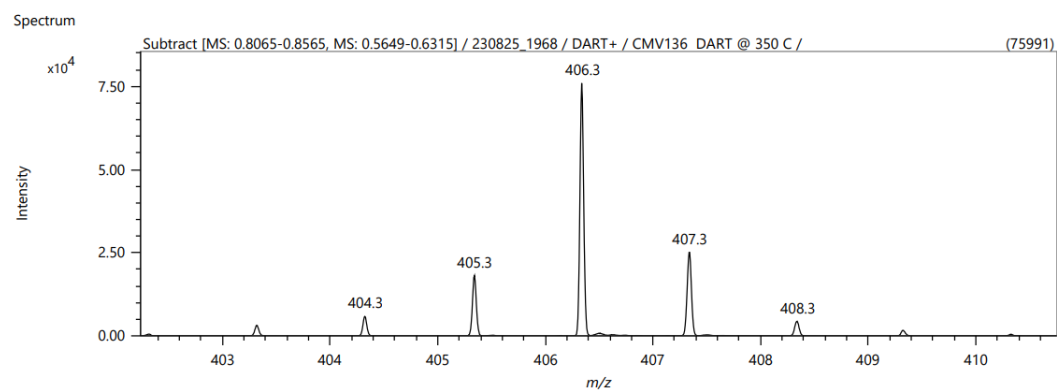

Elemental Composition

| Parameters |              | Elements Set 1: |     |     |    |    |   |   |
|------------|--------------|-----------------|-----|-----|----|----|---|---|
| Tolerance: | ±10.00 mDa   | Symbol          | C   | H   | O  | N  | S | B |
| Electron:  | Even         | Min             | 0   | 0   | 0  | 0  | 0 | 0 |
| Charge:    | +1           | Max             | 100 | 200 | 10 | 10 | 0 | 1 |
| DBE:       | -1.5 - 100.0 |                 |     |     |    |    |   |   |

Results

| Mass      | Intensity | Formula                                                                      | Calculated Mass | Mass Difference [mDa] | Mass Difference [ppm] | DBE |
|-----------|-----------|------------------------------------------------------------------------------|-----------------|-----------------------|-----------------------|-----|
| 406.33901 | 75990.64  | C <sub>26</sub> H <sub>41</sub> B <sub>3</sub> N <sub>3</sub>                | 406.33881       | 0.20                  | 0.50                  | 8.5 |
|           |           | C <sub>19</sub> H <sub>44</sub> N <sub>5</sub> O <sub>4</sub>                | 406.33878       | 0.23                  | 0.55                  | 0.5 |
|           |           | C <sub>20</sub> H <sub>40</sub> N <sub>9</sub>                               | 406.34012       | -1.11                 | -2.74                 | 5.5 |
|           |           | C <sub>15</sub> H <sub>41</sub> B <sub>3</sub> N <sub>9</sub> O <sub>3</sub> | 406.34199       | -2.99                 | -7.35                 | 0.5 |
|           |           | C <sub>24</sub> H <sub>44</sub> N <sub>3</sub> O <sub>2</sub>                | 406.34280       | -3.80                 | -9.35                 | 4.5 |
|           |           | C <sub>21</sub> H <sub>41</sub> B <sub>3</sub> N <sub>5</sub> O <sub>2</sub> | 406.33478       | 4.22                  | 10.40                 | 4.5 |

1 / 2

AIMS Mass Spectrometry Laboratory, University of Toronto

2023-08-25

Figure S36. HR-MS (TOF DART+) data for **10**.

### Synthesis of $(\text{H}_2\text{CN}(\text{Dipp}))_2\text{B}(\text{N}_3)$ **11**

$^1\text{H}$  NMR (400 MHz, Toluene- $d_8$ )  $\delta$  7.18 – 7.10 (m, 2H), 7.08 – 7.03 (m, 4H), 3.46 (hept,  $^3J_{\text{H-H}} = 7.0$  Hz, 4H), 3.41 (s, 4H), 1.33 (d,  $^3J_{\text{H-H}} = 7$  Hz, 12H), 1.27 (d,  $^3J_{\text{H-H}} = 7$  Hz, 12H).  $^{11}\text{B}$  NMR (128 MHz, Toluene- $d_8$ )  $\delta$  24.4.  $^{13}\text{C}\{^1\text{H}\}$  NMR (101 MHz, Toluene- $d_8$ )  $\delta$  147.8, 124.0, 52.0, 28.8, 24.8, 24.5, 1.4.

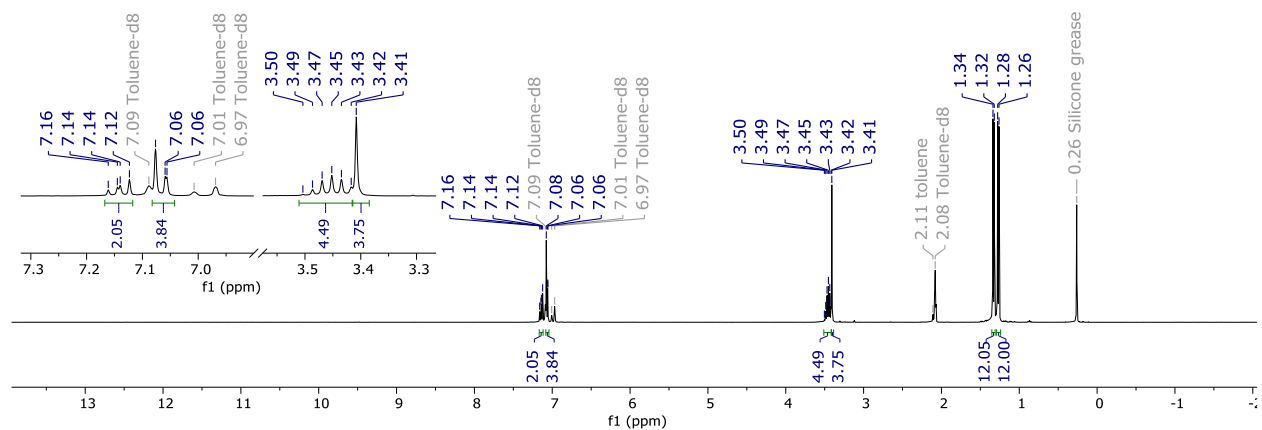

**Figure S37.**  $^1\text{H}$  NMR spectrum of **11** in toluene- $d_8$  at 298 K.

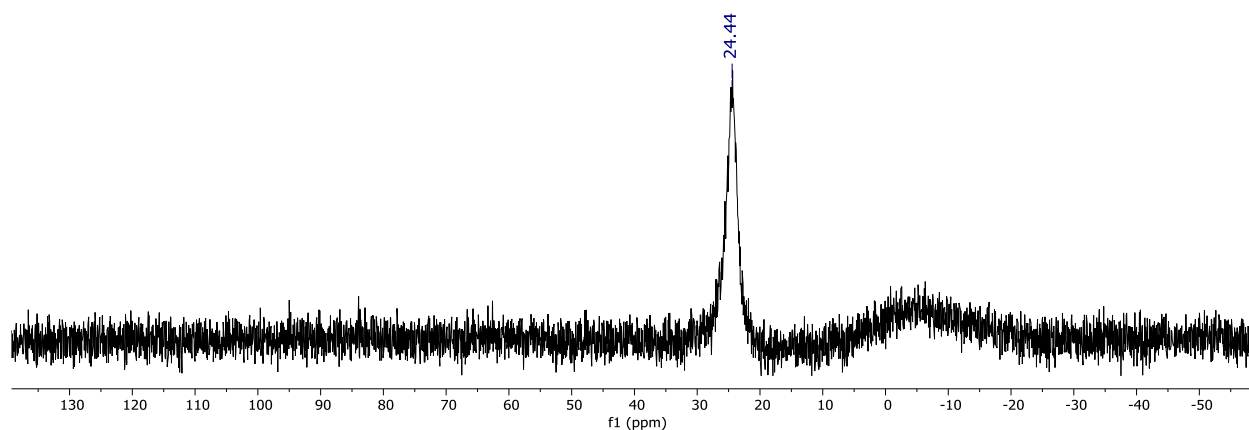

**Figure S38.**  $^{11}\text{B}$  NMR spectrum of **11** in toluene- $d_8$  at 298 K.

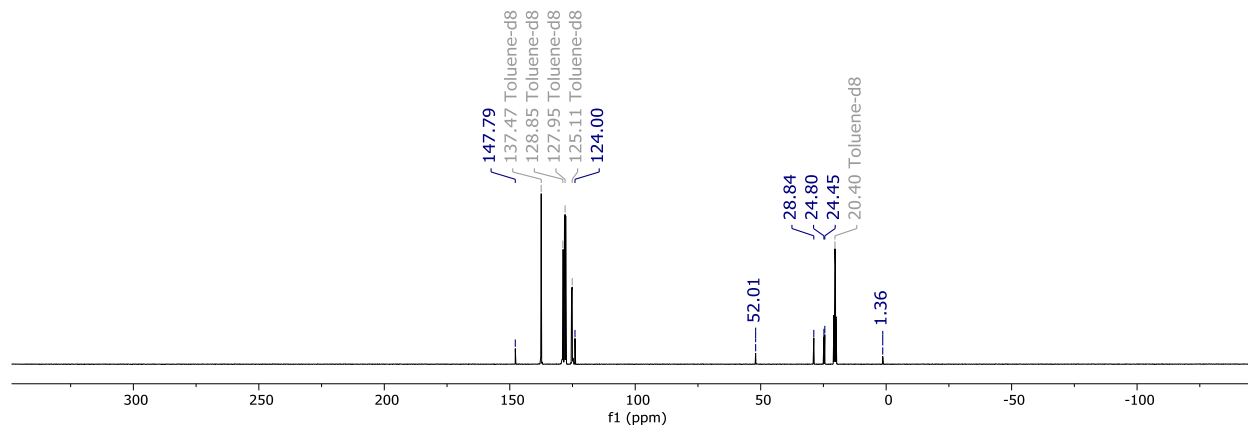

**Figure S39.**  $^{13}\text{C}$  NMR spectrum of **11** in toluene- $d_8$  at 298 K.

### Synthesis of $(\text{HCN}(\text{Dipp}))_2\text{B}(\text{NHPCl}_2)$ **12**.

$^1\text{H}$  NMR (400 MHz, Benzene- $d_6$ )  $\delta$  7.24 – 7.17 (m, 2H), 7.15 – 7.09 (m, 4H), 5.92 (s, 2H), 4.29 (d,  $^2J_{\text{P-H}} = 11$  Hz, 1H), 3.20 (hept,  $^3J_{\text{H-H}} = 7$  Hz, 5H), 1.30 (d,  $^3J_{\text{H-H}} = 7$  Hz, 13H), 1.18 (d,  $^3J_{\text{H-H}} = 7$  Hz, 13H).  $^{11}\text{B}$  NMR (128 MHz,  $\text{C}_6\text{D}_6$ )  $\delta$  21.1.  $^{13}\text{C}\{^1\text{H}\}$  NMR (126 MHz,  $\text{C}_6\text{D}_6$ )  $\delta$  147.0, 146.9, 146.5, 137.0, 137.0, 128.7, 124.3, 118.2, 28.8, 24.7, 23.9.  $^{31}\text{P}$  NMR (162 MHz,  $\text{C}_6\text{D}_6$ )  $\delta$  164.2.

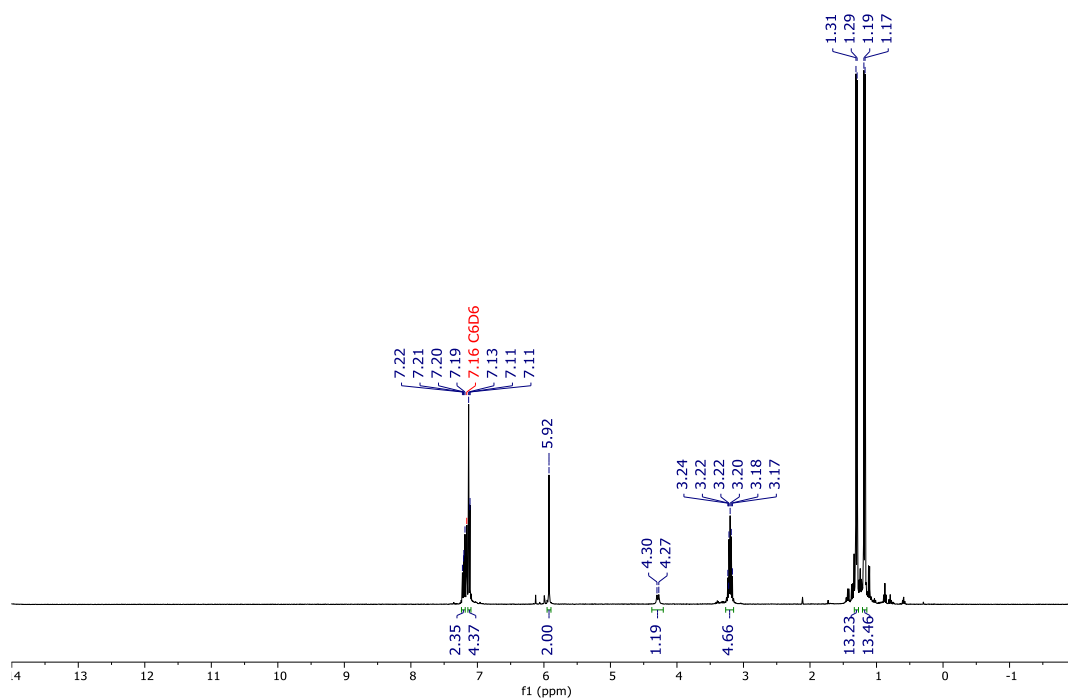

**Figure S40.**  $^1\text{H}$  NMR spectrum of **12** in  $\text{C}_6\text{D}_6$  at 298 K.

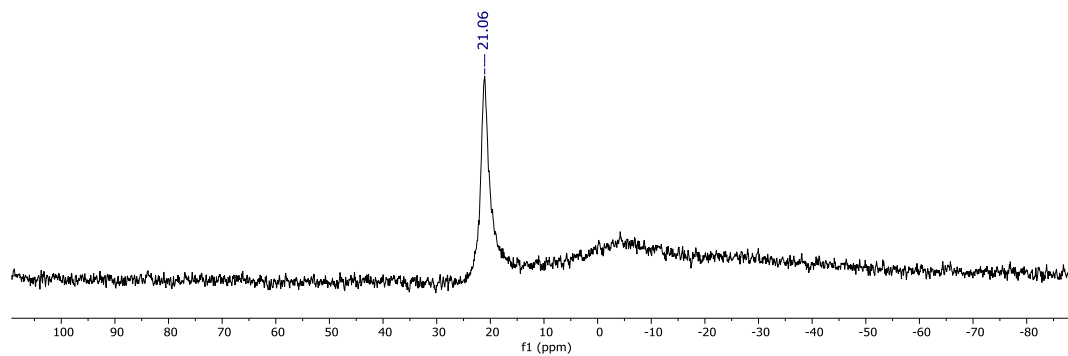

Figure S41.  $^{11}\text{B}$  NMR spectrum of **12** in  $\text{C}_6\text{D}_6$  at 298 K.

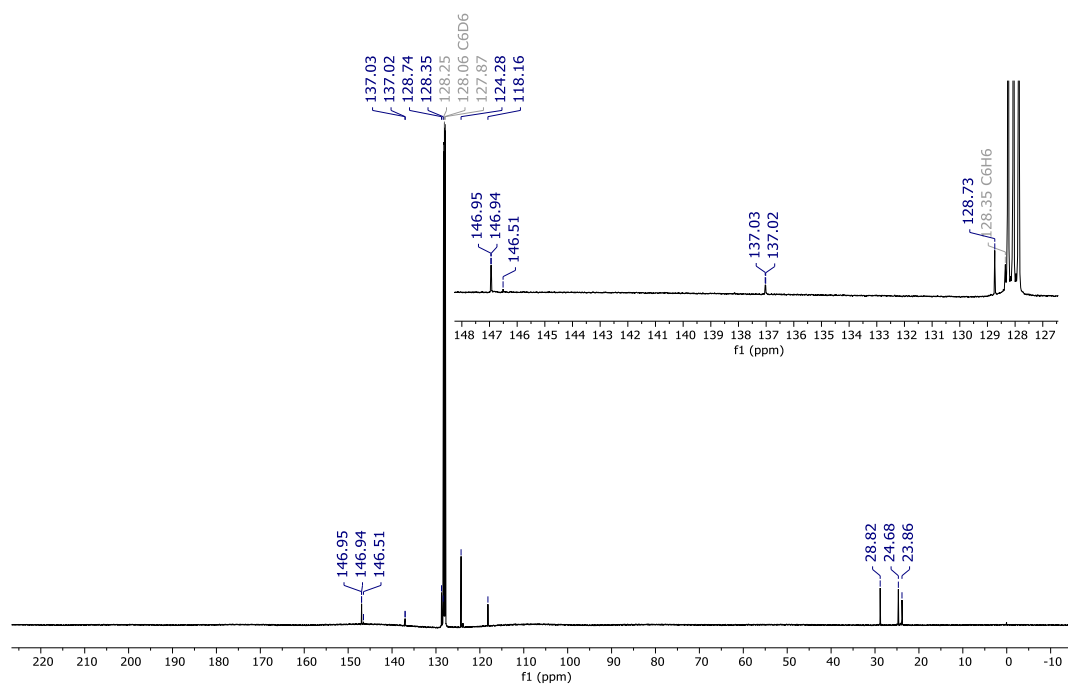

Figure S42.  $^{13}\text{C}\{^1\text{H}\}$  NMR spectrum of **12** in  $\text{C}_6\text{D}_6$  at 298 K.

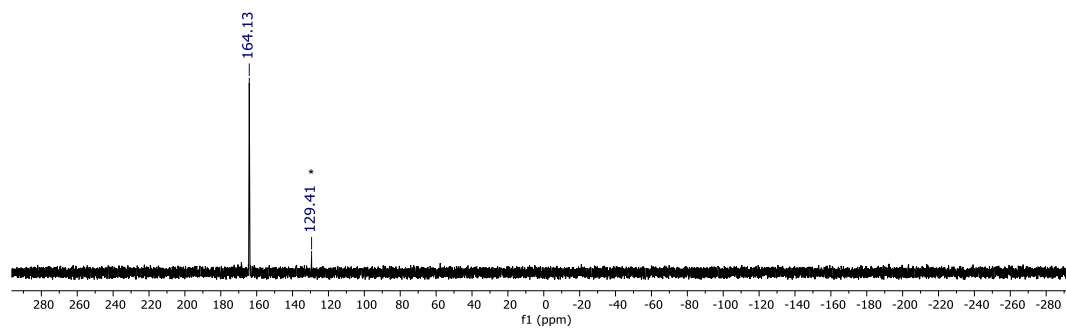

Figure S43.  $^{31}\text{P}$  NMR spectrum of **12** in  $\text{C}_6\text{D}_6$  at 298 K.

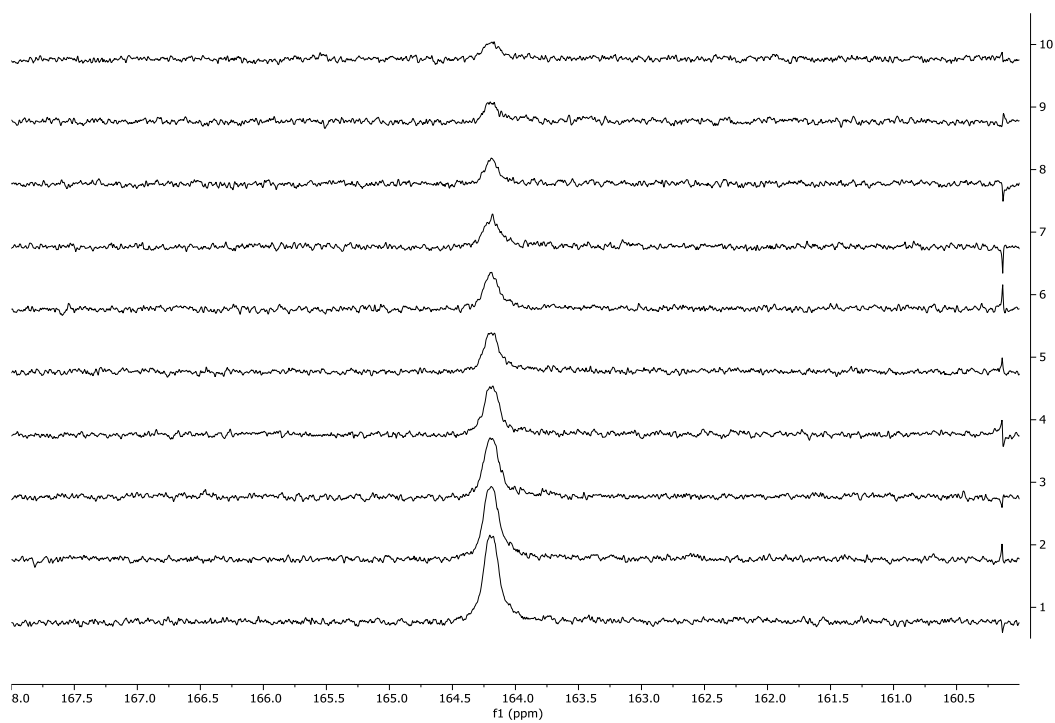

Figure S44. Raw  $^{31}\text{P}$  NMR DOSY spectrum of **12** in  $\text{C}_6\text{D}_6$  at 298 K.



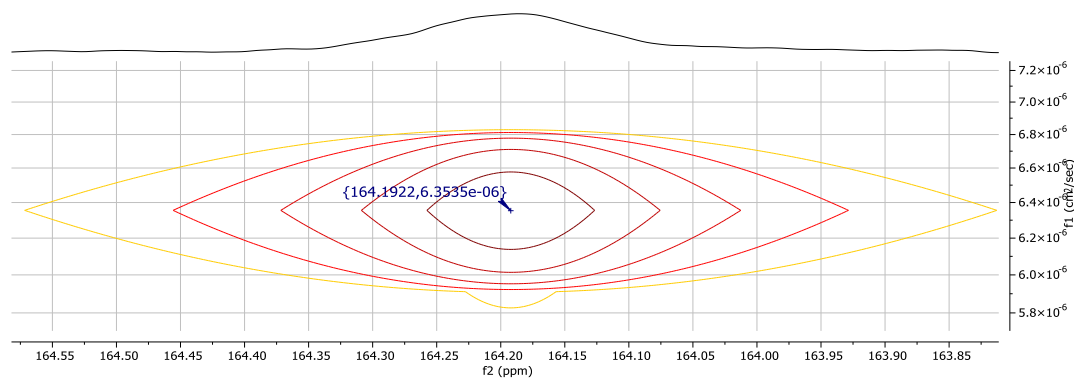

**Figure S45.** Processed  $^{31}\text{P}$  NMR DOSY spectrum of **12** in  $\text{C}_6\text{D}_6$  at 298 K.

### Synthesis of $(\text{HCN}(\text{Dipp}))_2\text{B}(\text{N}(\text{SiMe}_3)\text{PCl}_2)$ **15**.

$^1\text{H}$  NMR (500 MHz,  $\text{C}_6\text{D}_6$ )  $\delta$  7.25 – 7.19 (m, 2H), 7.15 – 7.09 (m, 4H), 6.10 (s, 2H), 3.36 (br, 2H), 3.14 (br, 2H), 1.40 (br, 6H), 1.31 (br, 6H), 1.12 (d,  $^3J_{\text{H-H}} = 7$  Hz, 12H), 0.19 (s, 9H).  $^{11}\text{B}$  NMR (128 MHz,  $\text{C}_6\text{D}_6$ )  $\delta$  22.6.  $^{13}\text{C}\{^1\text{H}\}$  NMR (126 MHz,  $\text{C}_6\text{D}_6$ )  $\delta$  147.1, 145.9, 137.67, 124.2, 119.9, 29.7, 28.4, 26.5, 23.1, 22.6, 3.0, 3.0.  $^{31}\text{P}$  NMR (162 MHz,  $\text{C}_6\text{D}_6$ )  $\delta$  175.7. *HRMS* (TOF, DART+)  $m/z$  576.26719 (calc. for protonated molecular ion,  $[\text{C}_{29}\text{H}_{46}\text{BN}_3\text{SiPCl}_2]^+$ : 576.26632) *MS* (TOF, DART+)  $m/z$  540.3 (calc. for  $\text{Cl}^-$  loss,  $[\text{C}_{29}\text{H}_{45}\text{BN}_3\text{SiPCl}]^+$ : 540.29). *MS* (TOF, DART+)  $m/z$  404.3 (calc. for hydrolysis and protonation *i.e.*  $-\text{N}(\text{PCl}_2)(\text{SiMe}_3)$  to  $-\text{NH}_3^+$ ,  $[\text{C}_{26}\text{H}_{39}\text{BN}_3]^+$ : 404.32).

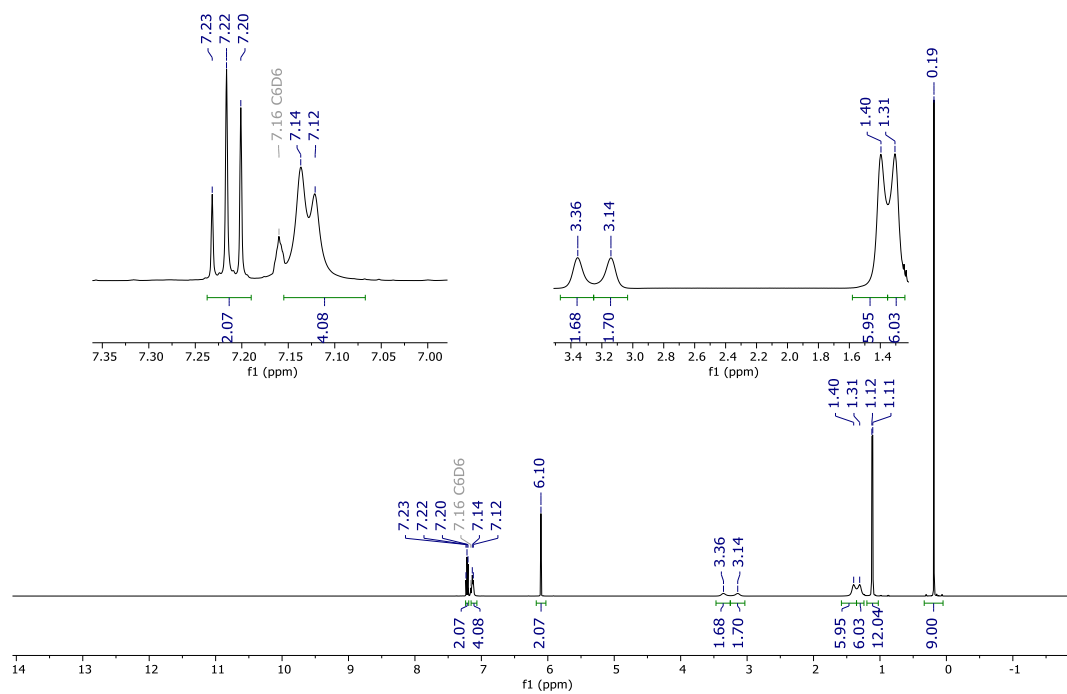

Figure S46.  $^1\text{H}$  NMR spectrum of **15** in  $\text{C}_6\text{D}_6$  at 298 K.

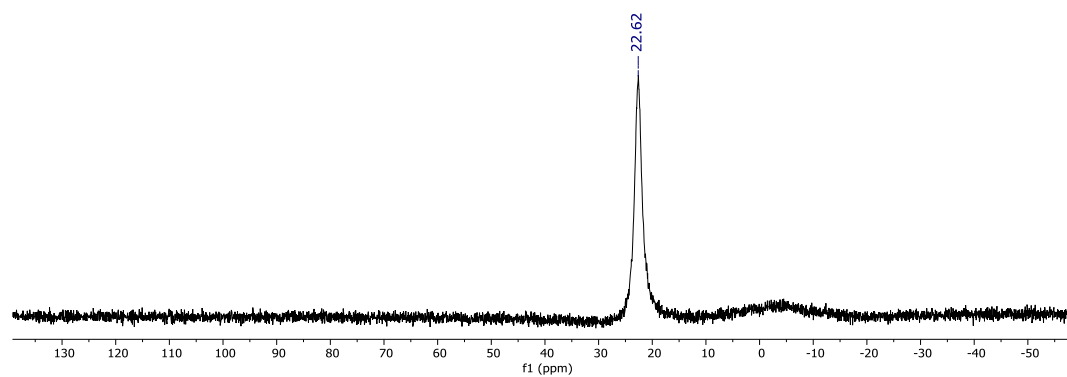

Figure S47.  $^{11}\text{B}$  NMR spectrum of **15** in  $\text{C}_6\text{D}_6$  at 298 K.

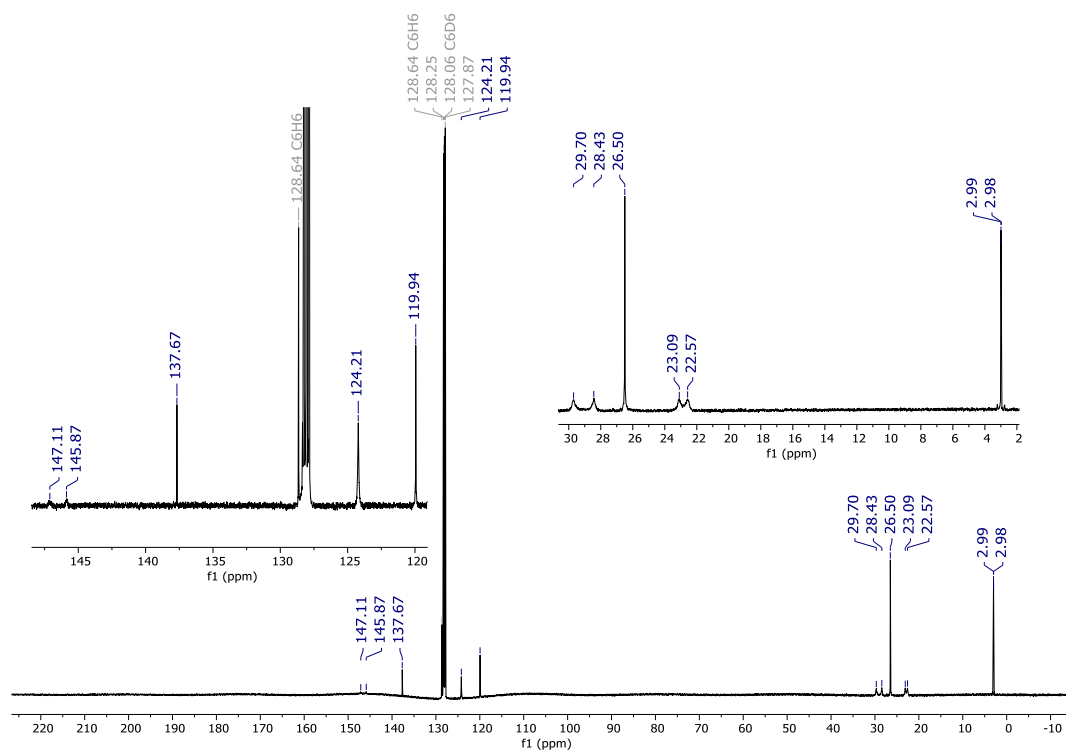

Figure S48.  $^{13}\text{C}\{^1\text{H}\}$  NMR spectrum of **15** in  $\text{C}_6\text{D}_6$  at 298 K.

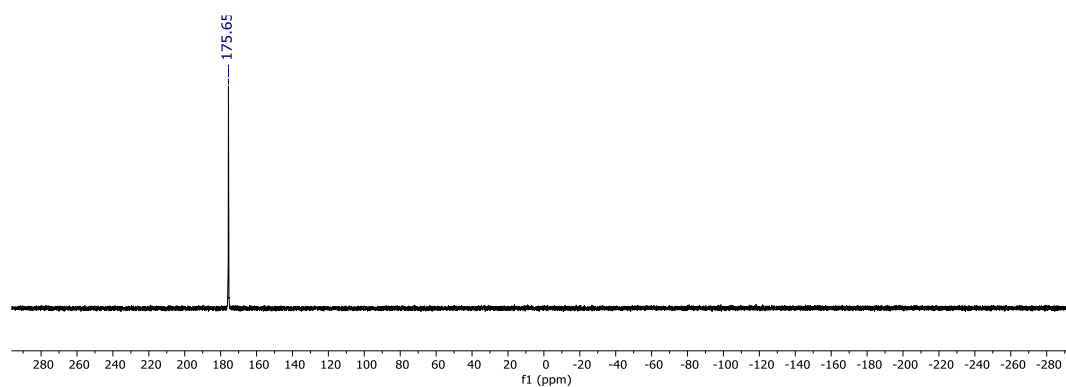

Figure S49.  $^{31}\text{P}$  NMR spectrum of **15** in  $\text{C}_6\text{D}_6$  at 298 K.

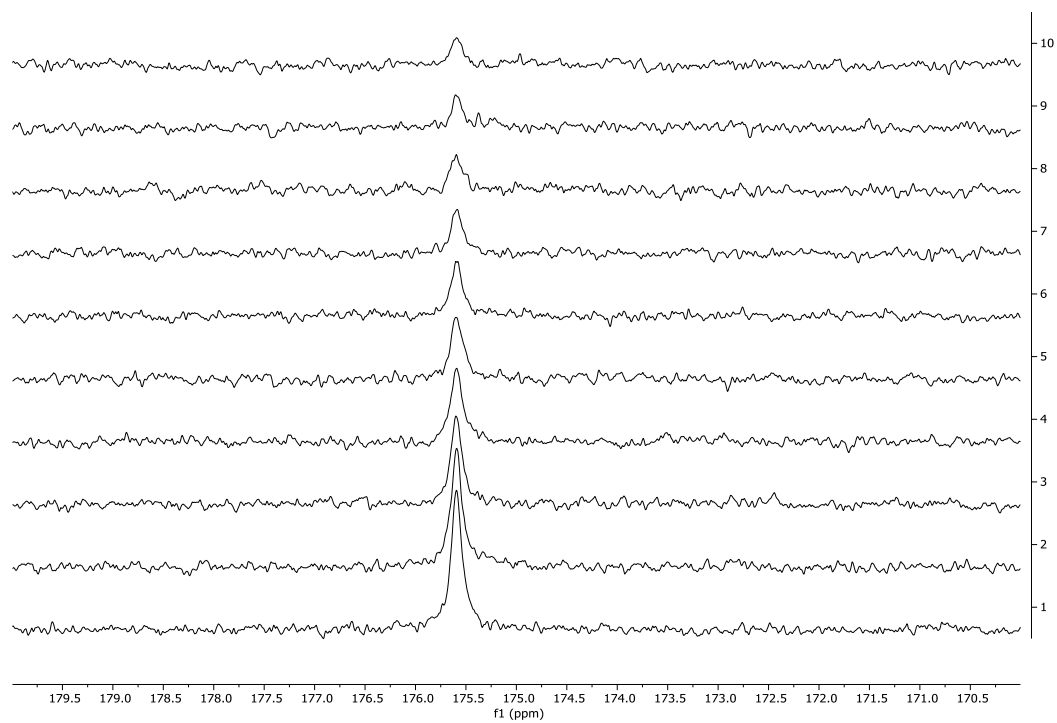

Figure S50. Raw  $^{31}\text{P}$  NMR DOSY spectrum of **15** in  $\text{C}_6\text{D}_6$  at 298 K.

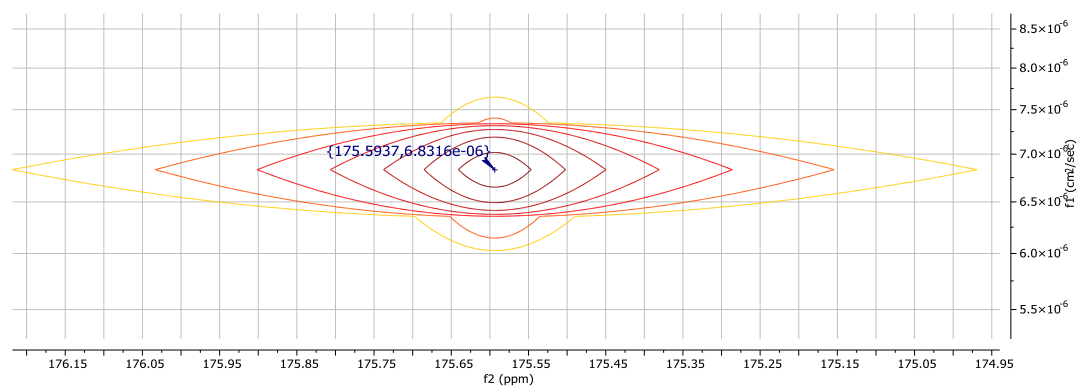

Figure S51. Processed  $^{31}\text{P}$  NMR DOSY spectrum of **15** in  $\text{C}_6\text{D}_6$  at 298 K.

## DART IONIZATION

AccuTOF 4G

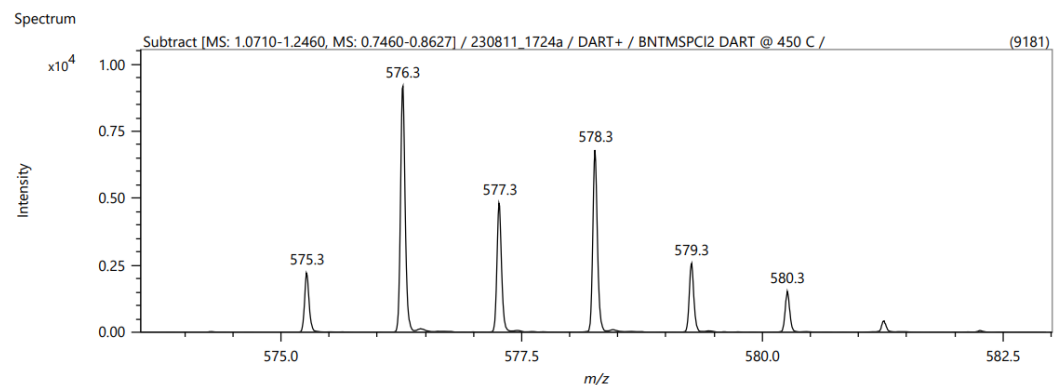

## Elemental Composition

## Parameters

Tolerance:  $\pm 10.00$  mDa  
 Electron: Even  
 Charge: +1  
 DBE: -1.5 - 100.0

## Elements Set 1:

| Symbol | C   | H   | O  | N  | Cl | Si | B | P |
|--------|-----|-----|----|----|----|----|---|---|
| Min    | 0   | 0   | 0  | 0  | 2  | 0  | 1 | 0 |
| Max    | 100 | 200 | 10 | 10 | 2  | 1  | 1 | 1 |

## Results

| Mass      | Intensity | Formula                | Calculated Mass | Mass Difference [mDa] | Mass Difference [ppm] | DBE  |
|-----------|-----------|------------------------|-----------------|-----------------------|-----------------------|------|
| 576.26719 | 9180.68   | C28 H41 B N5 O3 Cl2    | 576.26740       | -0.21                 | -0.37                 | 10.5 |
|           |           | C19 H45 B N7 O6 Si Cl2 | 576.26652       | 0.67                  | 1.16                  | 1.5  |
|           |           | C22 H42 B N9 O2 P Cl2  | 576.26637       | 0.82                  | 1.42                  | 6.5  |
|           |           | C29 H46 B N3 Si P Cl2  | 576.26632       | 0.87                  | 1.50                  | 9.5  |
|           |           | C27 H45 B N O7 Cl2     | 576.26607       | 1.12                  | 1.95                  | 5.5  |
|           |           | C26 H46 B N3 O4 P Cl2  | 576.26906       | -1.87                 | -3.24                 | 5.5  |

1 / 2

AIMS Mass Spectrometry Laboratory, University of Toronto

2023-08-11

Figure S52. HR-MS (TOF DART+) data for **15**.

Synthesis of  $(\text{HCN}(\text{Dipp}))_2\text{B}(\text{N}(\text{SiMe}_3)\text{PCl}(\text{O}_3\text{SCF}_3))$   $^{1}\text{H}$  NMR (400 MHz,  $\text{C}_6\text{D}_6$ )  $\delta$  7.35 – 7.26 (m, 1H), 7.21 – 7.17 (m, 2H), 7.11 – 7.04 (m, 1H), 6.05 (s, 2H), 3.28 (br, m, 2H), 3.07 (br, m, 1H), 2.96 (br, m, 1H), 1.47 (d,  $^3J_{\text{H-H}} = 7$  Hz, 3H), 1.38 (d,  $^3J_{\text{H-H}} = 7$  Hz, 3H), 1.32 (d,  $^3J_{\text{H-H}} = 7$  Hz, 3H), 1.21 (d,  $^3J_{\text{H-H}} = 7$  Hz, 3H), 1.17 – 0.99 (br, m, 12H), 0.07 (s, 9H).  $^{11}\text{B}$  NMR (128 MHz,  $\text{C}_6\text{D}_6$ )  $\delta$  22.1.  $^{13}\text{C}\{^1\text{H}\}$  NMR (126 MHz,  $\text{C}_6\text{D}_6$ )  $\delta$  147.0, 146.9, 146.5, 137.0, 137.0, 128.7, 124.3, 118.2, 28.8, 24.7, 23.9, 0.0.  $^{19}\text{F}$  NMR (377 MHz,  $\text{C}_6\text{D}_6$ )  $\delta$  -75.7.  $^{31}\text{P}$  NMR (162 MHz,  $\text{C}_6\text{D}_6$ )  $\delta$  181.1.

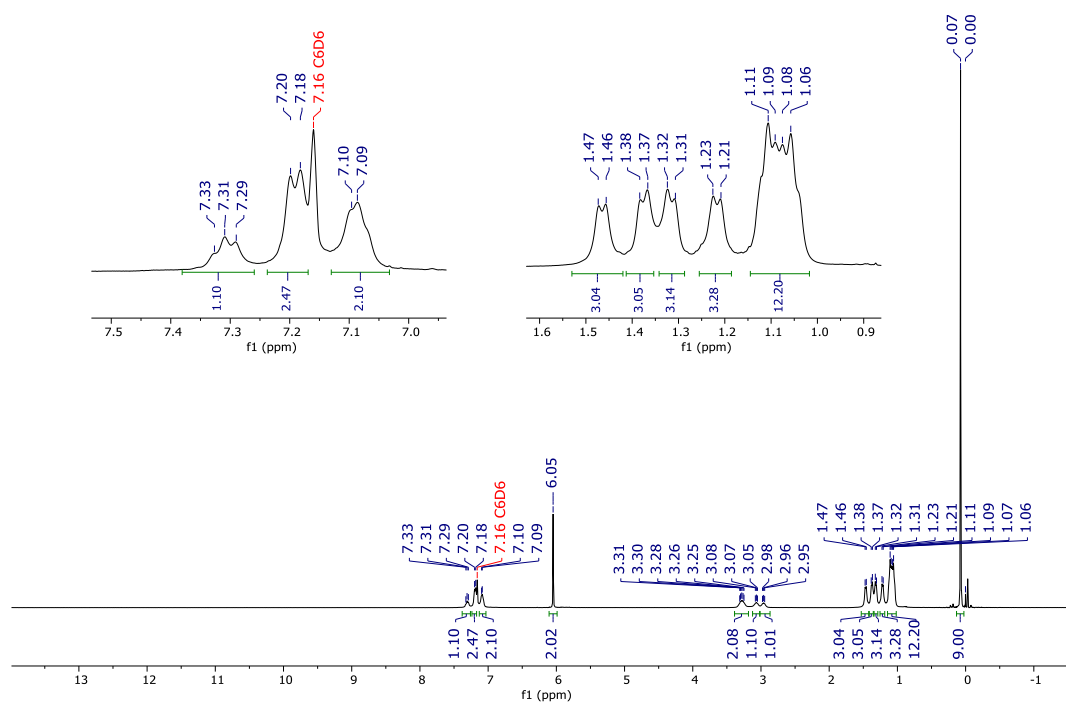

Figure S53.  $^1\text{H}$  NMR spectrum of **16** in  $\text{C}_6\text{D}_6$  at 298 K.

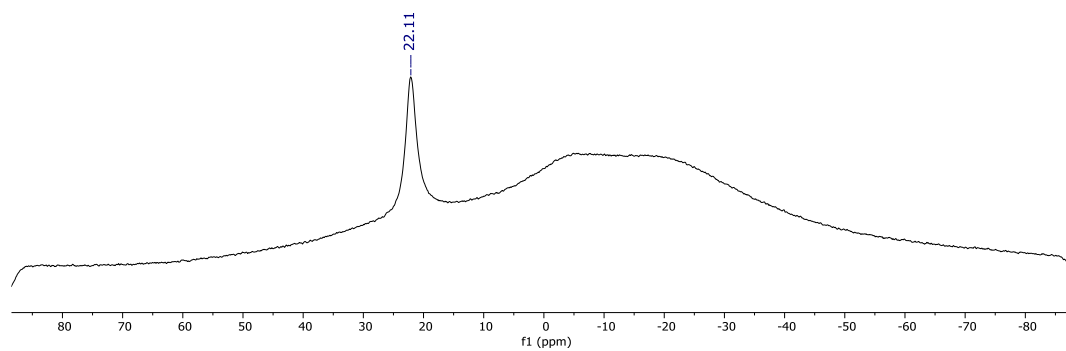

Figure S54.  $^{11}\text{B}$  NMR spectrum of **16** in  $\text{C}_6\text{D}_6$  at 298 K.

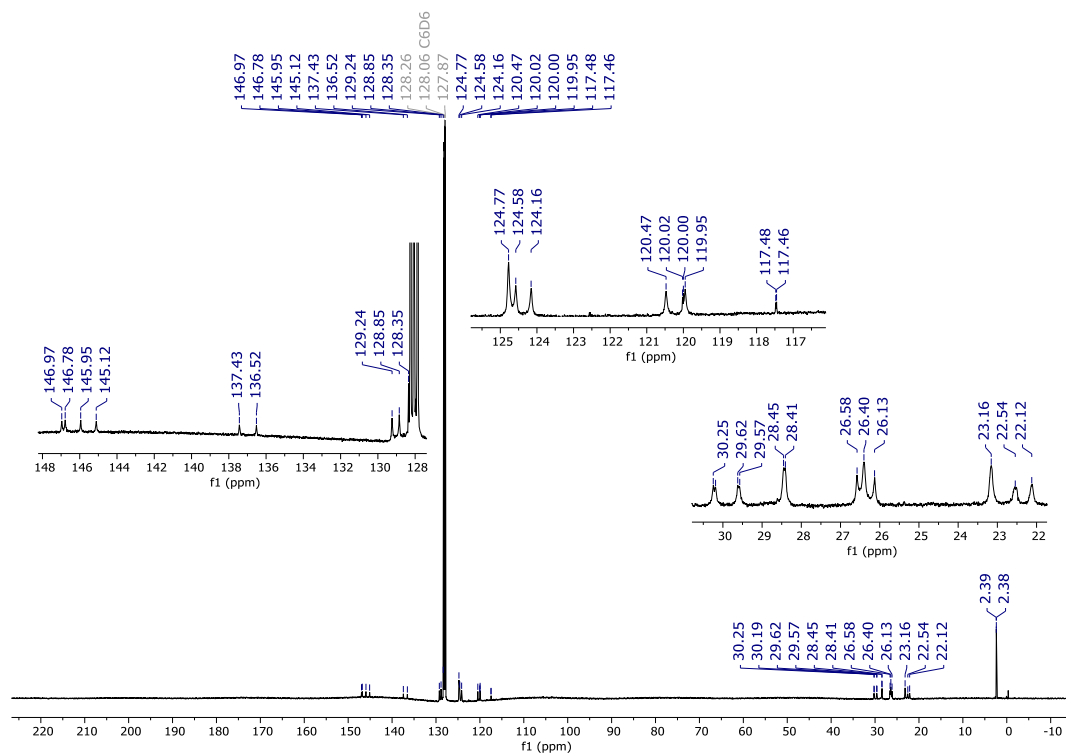

Figure S55.  $^{13}\text{C}\{^1\text{H}\}$  NMR spectrum of **16** in  $\text{C}_6\text{D}_6$  at 298 K.

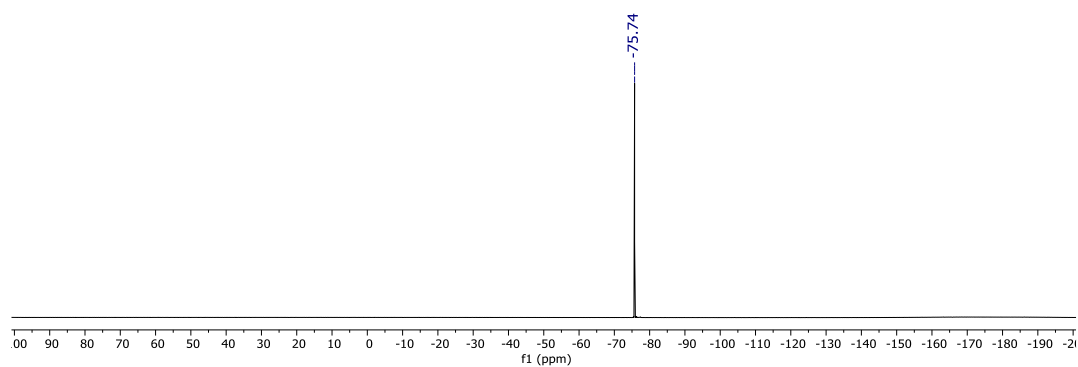

Figure S56.  $^{19}\text{F}$  NMR spectrum of **16** in  $\text{C}_6\text{D}_6$  at 298 K.

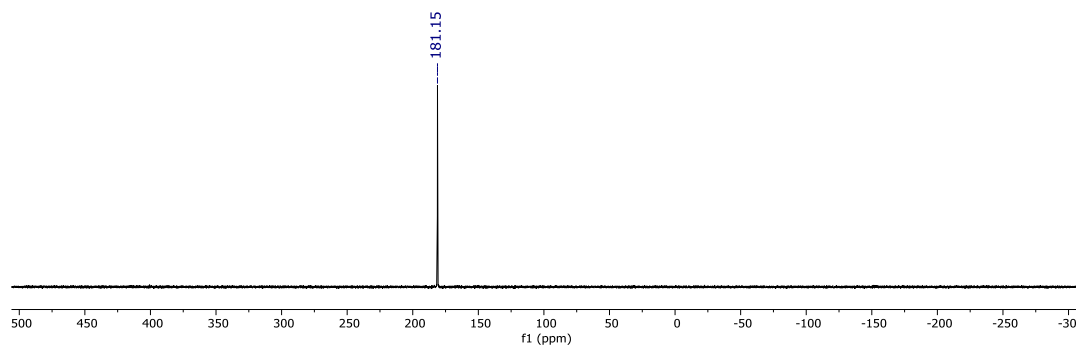

**Figure S57.**  $^{31}\text{P}$  NMR spectrum of **16** in  $\text{C}_6\text{D}_6$  at 298 K.

### Synthesis of $[(\text{HCN}(\text{Dipp}))_2\text{BNPCI}]_2$ **17**

$^1\text{H}$  NMR (300 MHz,  $\text{C}_6\text{D}_6$ )  $\delta$  7.22 – 7.18 (m, 4H), 7.10 – 7.03 (m, 8H), 5.91 (s, 4H), 3.15 (hept,  $^3J_{\text{H-H}} = 7$  Hz, 8H), 1.27 (d,  $^3J_{\text{H-H}} = 7$  Hz, 24H), 1.14 (d,  $^3J_{\text{H-H}} = 7$  Hz, 24H).  $^{11}\text{B}$  NMR (128 MHz,  $\text{C}_6\text{D}_6$ )  $\delta$  20.1.  $^{13}\text{C}\{^1\text{H}\}$  NMR (126 MHz,  $\text{C}_6\text{D}_6$ )  $\delta$  146.8, 137.7, 128.5, 123.9, 119.3, 29.0, 25.8, 23.2.  $^{31}\text{P}$  NMR (121 MHz,  $\text{C}_6\text{D}_6$ )  $\delta$  228.3.

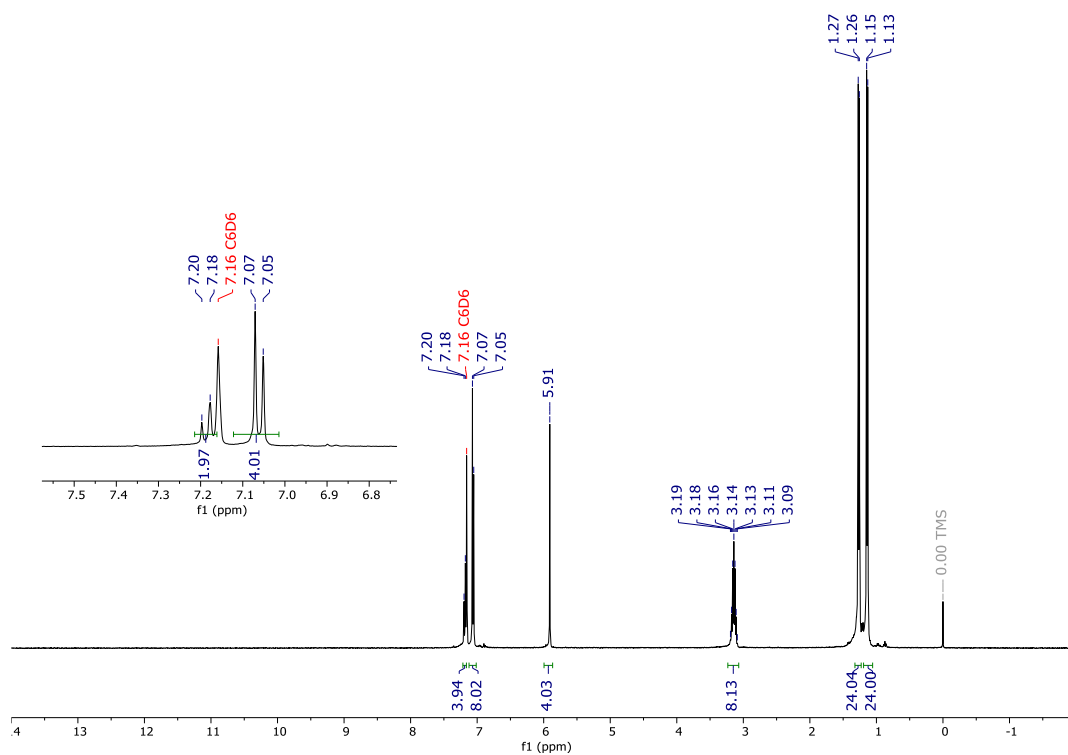

**Figure S58.**  $^1\text{H}$  NMR spectrum of **17** in  $\text{C}_6\text{D}_6$  at 298 K.



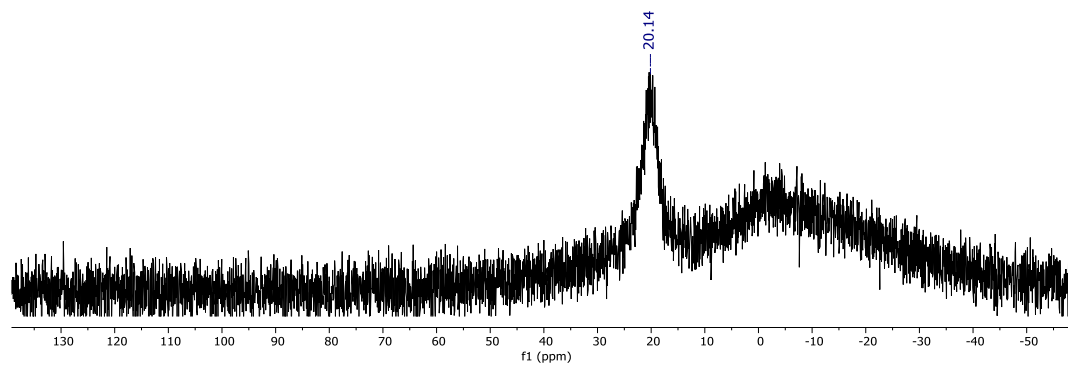

Figure S59. <sup>11</sup>B NMR spectrum of **17** in C<sub>6</sub>D<sub>6</sub> at 298 K.

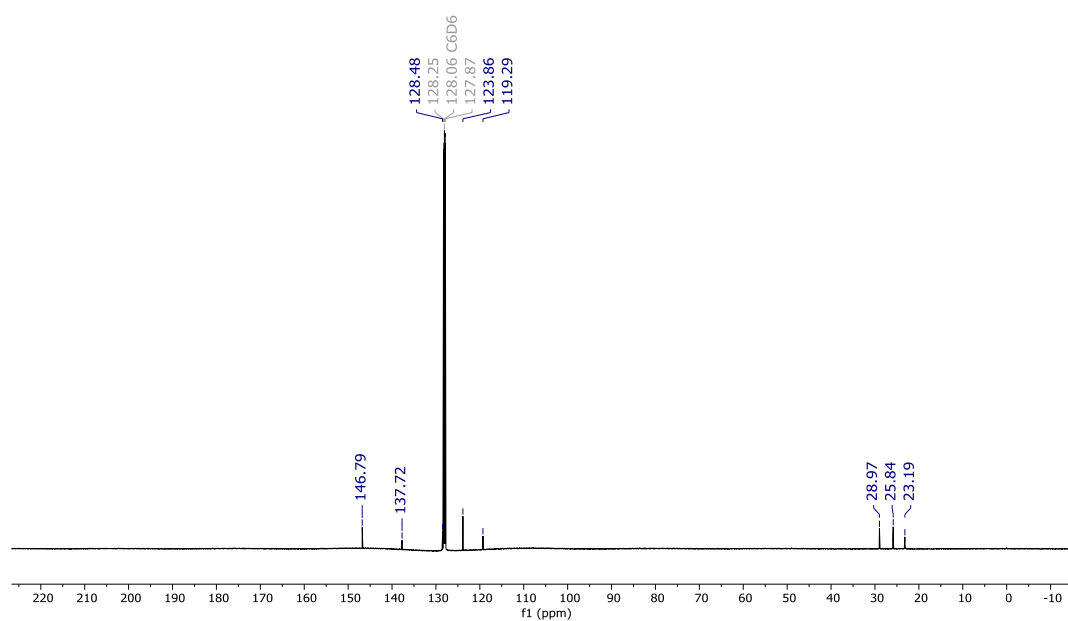

Figure S60. <sup>13</sup>C{<sup>1</sup>H} NMR spectrum of **17** in C<sub>6</sub>D<sub>6</sub> at 298 K.

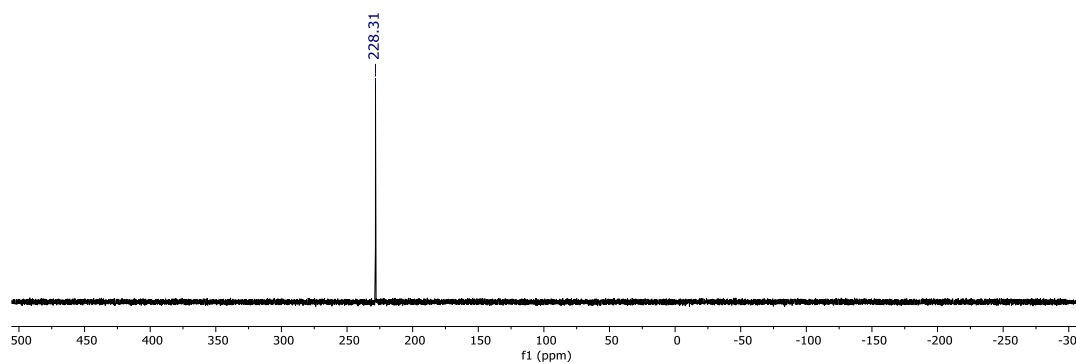

Figure S61. <sup>31</sup>P NMR spectrum of **17** in C<sub>6</sub>D<sub>6</sub> at 298 K.

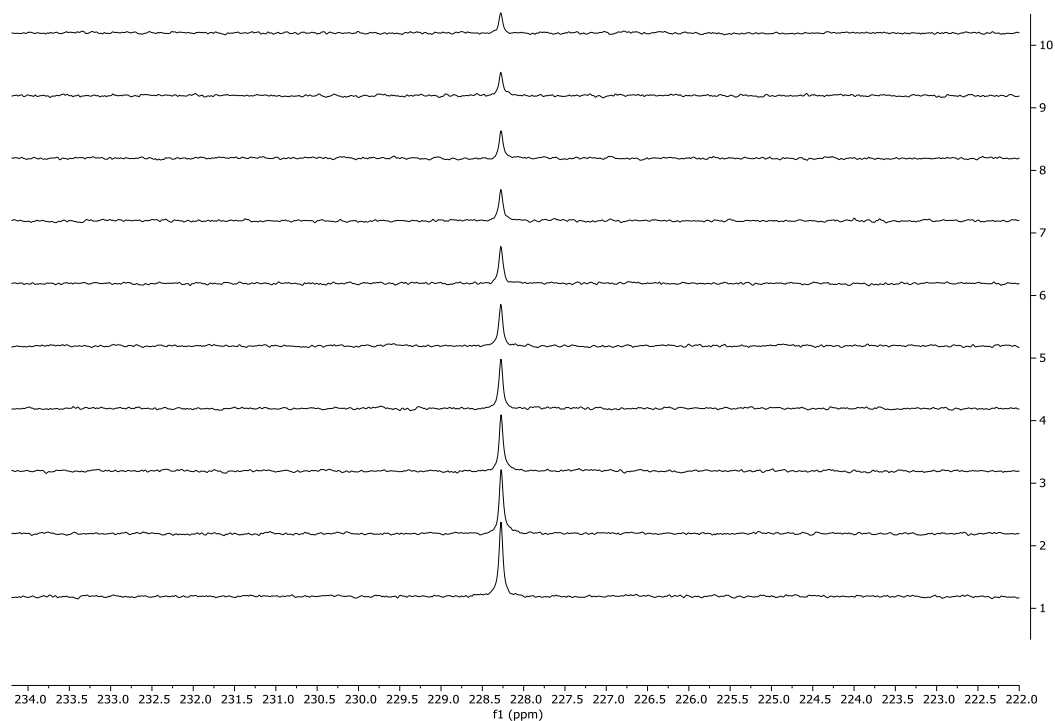

**Figure S62.** Raw  $^{31}\text{P}$  NMR DOSY spectrum of **17** in  $\text{C}_6\text{D}_6$  at 298 K.

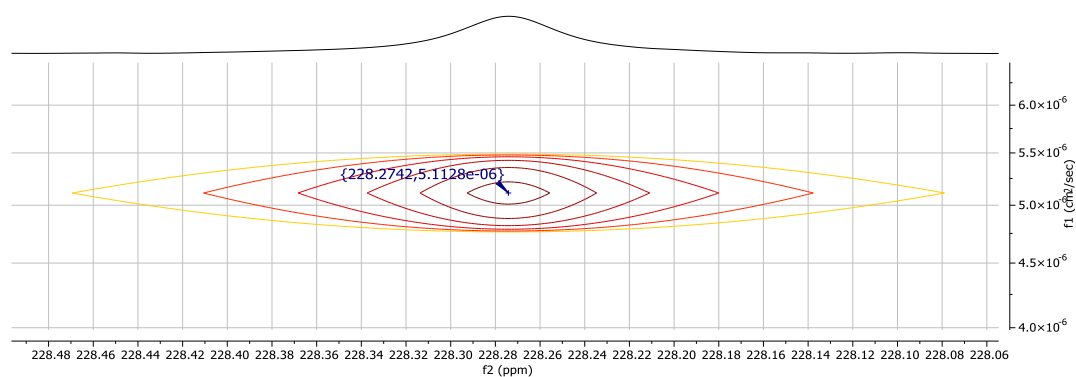

**Figure S63.** Processed  $^{31}\text{P}$  NMR DOSY spectrum of **17** in  $\text{C}_6\text{D}_6$  at 298 K.

1. Y. Segawa, Y. Suzuki, M. Yamashita and K. Nozaki, *J. Am. Chem. Soc.*, 2008, **130**, 16069-16079.
2. D. Herrmannsdörfer, M. Kaaz, O. Puntigam, J. Bender, M. Nieger and D. Gudat, *Eur. J. Inorg. Chem.*, 2015, **2015**, 4819-4828.
3. T. J. Hadlington, J. A. B. Abdalla, R. Tirfoin, S. Aldridge and C. Jones, *Chem. Commun.*, 2016, **52**, 1717-1720.
